# Supplementary material for: Separation of Anionic Chlorinated Dyes from Polluted Aqueous Streams Using Ionic Liquids and Their Subsequent Recycling
Source: MDPI journal article supplement (doi:10.3390/ijms241512235), 2023-07-31

*Supplementary Materials*

# **Separation of Anionic Chlorinated Dyes from Polluted Aqueous Streams Using Ionic Liquids and Their Subsequent Recycling**

**Barbora Kamenická <sup>1</sup>, Petr Švec <sup>2</sup>, and Tomáš Weidlich <sup>1\*</sup>**

<sup>1</sup> Chemical Technology Group, Institute of Environmental and Chemical Engineering, Faculty of Chemical Technology, University of Pardubice, Studentská 573, 532 10 Pardubice, Czech Republic.

<sup>2</sup> Department of General and Inorganic Chemistry, Faculty of Chemical Technology, University of Pardubice, Studentská 573, 532 10 Pardubice, Czech Republic.

\* Correspondence: tomas.weidlich@upce.cz; Tel.: +420-46-603-8049

Academic Editor: name

Received: ..... 2023; Accepted: ... 2023; Published: .....2023

**Number of pages: 29**

**Number of Tables: 2**

**Number of Schemes: 2**

**Number of Figures: 14**

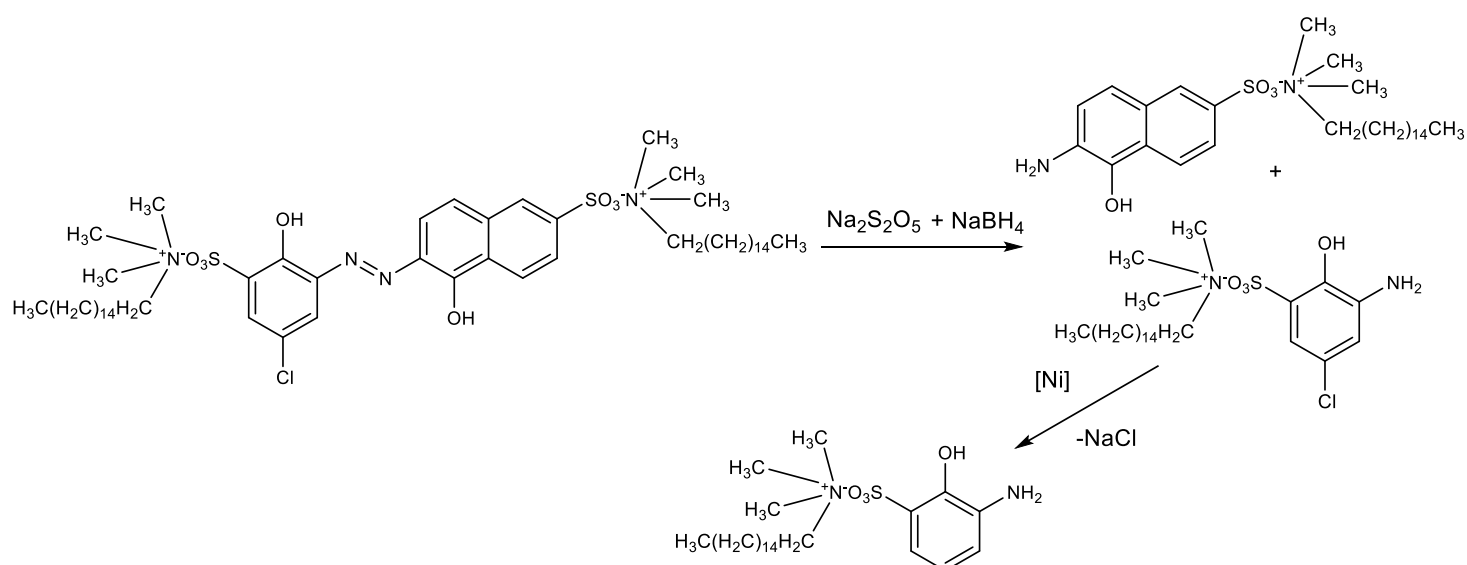

**Scheme S1.** Proposed reaction pathway of the reductive degradation and subsequent HDC of ion pair (AlkMe<sub>3</sub>N)<sub>2</sub>.MB9 using NaBH<sub>4</sub>/Na<sub>2</sub>S<sub>2</sub>O<sub>5</sub> in combination with the Al-Ni alloy.

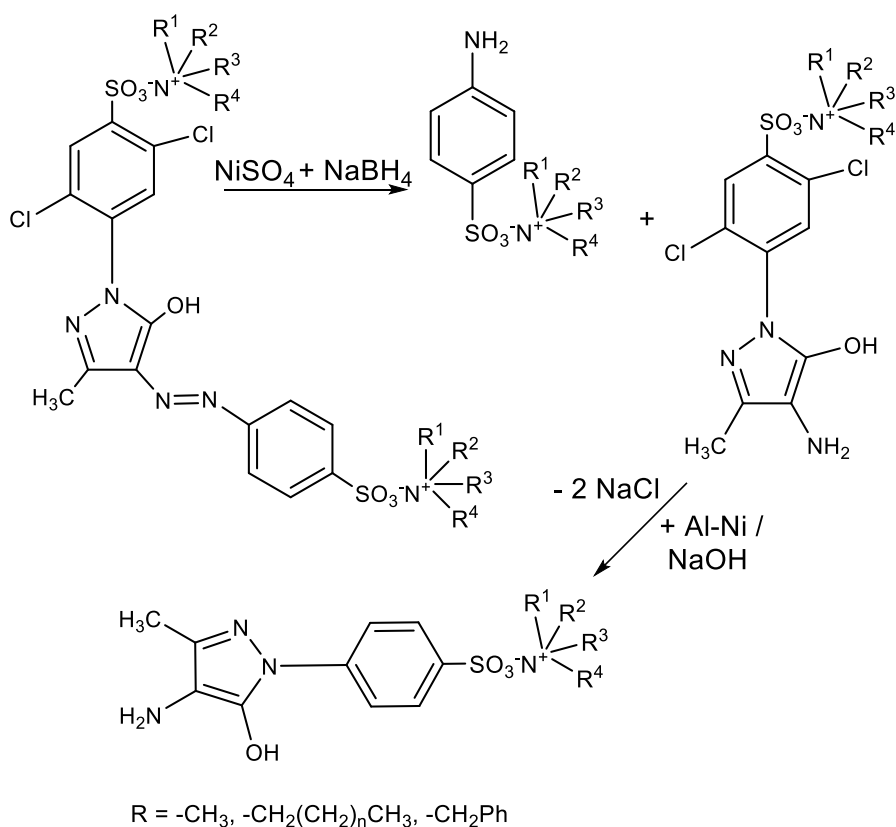

**Scheme S2.** Proposed reaction pathway of the reductive degradation and subsequent HDC of ion pair (R<sub>4</sub>N)<sub>2</sub>.AY17 using NaBH<sub>4</sub>/NiSO<sub>4</sub> in combination with the Al-Ni alloy.

**Table S1.** A comparison of acid dyes extraction and ion exchange methods using ILs.

| Method       | Type of dye                                                                                                  | Concentration<br>of dye (mg/L) | ILs <sup>a</sup>           | Dosage<br>of ILs<br>(g/L) | Removal<br>efficiency<br>(%) | Ref.         |
|--------------|--------------------------------------------------------------------------------------------------------------|--------------------------------|----------------------------|---------------------------|------------------------------|--------------|
| Extraction   | 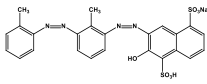<br>Acid Red Dye *          | 5                              | [p14][tf2N]                | 700                       | 98                           | [16]         |
| Extraction   | <br>Acid Orange 52          | 1000                           | [C8mim][PF6]               | 246.9                     | 99                           | [17]         |
| Extraction   | <br>Acid Yellow RN          | 100                            | [Bmim][PF6]                | 1380                      | 92.87                        | [18]         |
| Extraction   | <br>Congo Red             | 250                            | [Hmim][tf2N]               | 40                        | 95                           | [19]         |
| Extraction   | <br>Methyl Orange         | 40                             | [Capryl3MeN][SCN]          | 276                       | 89.09                        | [20]         |
| Extraction   | <br>Eriochrome<br>Black T | 250                            | [C6mim][BF4]               | 43.1                      | 99.65                        | [21]         |
| Extraction   | <br>Methyl Orange         | 1000                           | [PC6C6C6C14]<br>[N(CN)2]   | 20                        | 100                          | [22]         |
| Extraction   | „Royal acid<br>dye’’ (from<br>Brazilian textile<br>industry)<br>wastewater)                                  | 50                             | [PC6C6C6C14]<br>[C9H19COO] | 0.125                     | 94                           | [23]         |
| Ion exchange | <br>Mordant Blue 9        | 2111                           | Luv. Mono LS               | 17.8                      | 90                           | This<br>work |

| Method       | Type of dye                                                                                         | Concentration<br>of dye (mg/L) | ILs <sup>a</sup> | Dosage<br>of ILs<br>(g/L) | Removal<br>efficiency<br>(%) | Ref.      |
|--------------|-----------------------------------------------------------------------------------------------------|--------------------------------|------------------|---------------------------|------------------------------|-----------|
| Ion exchange | 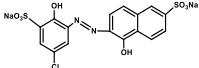<br>Mordant Blue 9 | 2111                           | BzkoniumCl       | 17.3                      | 82.1                         | This work |
| Ion exchange | <br>Mordant Blue 9 | 2111                           | A336             | 20.2                      | 93.2                         | This work |

<sup>a</sup> Abbreviations: [p<sub>14</sub>][tf<sub>2</sub>N] – N-butyl,N-methyl pyrrolidiniumbis(trifluoromethanesulfonyl) imide; [C<sub>8</sub>mim][PF<sub>6</sub>] – 1-octyl-3-methylimidazolium hexafluorophosphate; [Bmim][PF<sub>6</sub>] – 1-Butyl-3-methylimidazolium hexafluorophosphate; [Hmim][tf<sub>2</sub>N] – 1-Hexyl-3-methylimidazoliumbis(trifluoromethylsulfonyl) imide; [Capryl3MeN][SCN] – Tricaprylmethylammonium thiocyanate; [C<sub>6</sub>mim][BF<sub>4</sub>] – 3-methylimidazolium tetrafluoroborate; [PC<sub>6</sub>C<sub>6</sub>C<sub>14</sub>][N(CN)<sub>2</sub>] – Trihexyl(tetradecyl)phosphonium bis(trifluoromethanesulfonyl) dicyanamide; [PC<sub>6</sub>C<sub>6</sub>C<sub>14</sub>][C<sub>9</sub>H<sub>19</sub>COO] – Trihexyl(tetradecyl)phosphonium 4-methylnonanoate.

Notes: \*Commercial name not specified

**Table S2.** Comparison of costs of various reductive methods of ion pairs (calculated per mol of MB9).

| Applied reductive agent                           | Reactants / 1 mol of<br>(R <sub>4</sub> N) <sub>2</sub> .MB9                                                                | Price of method<br>per mol of<br>(R <sub>4</sub> N) <sub>2</sub> . MB9 * |
|---------------------------------------------------|-----------------------------------------------------------------------------------------------------------------------------|--------------------------------------------------------------------------|
| NaBH <sub>4</sub>                                 | 100 mol NaBH <sub>4</sub>                                                                                                   | 522 \$                                                                   |
| Al-Ni alloy/NaOH                                  | 64 mol Al in Al-Ni alloy /<br>300 mol NaOH                                                                                  | 1160 \$                                                                  |
| NaBH <sub>4</sub> /NiSO <sub>4</sub>              | 50 mol NaBH <sub>4</sub> (12% NaBH <sub>4</sub><br>in 14M NaOH) / 10 mol<br>NiSO <sub>4</sub>                               | 327 \$                                                                   |
| NaBH <sub>4</sub> /NiSO <sub>4</sub> /Al-Ni alloy | 50 mol NaBH <sub>4</sub> (12% NaBH <sub>4</sub><br>in 14M NaOH) / 10 mol<br>NiSO <sub>4</sub> + 20 mol Al in Al-Ni<br>alloy | 639 \$                                                                   |

\* Costs are calculated with respect to the lowest available price according to global market suppliers, see [9].

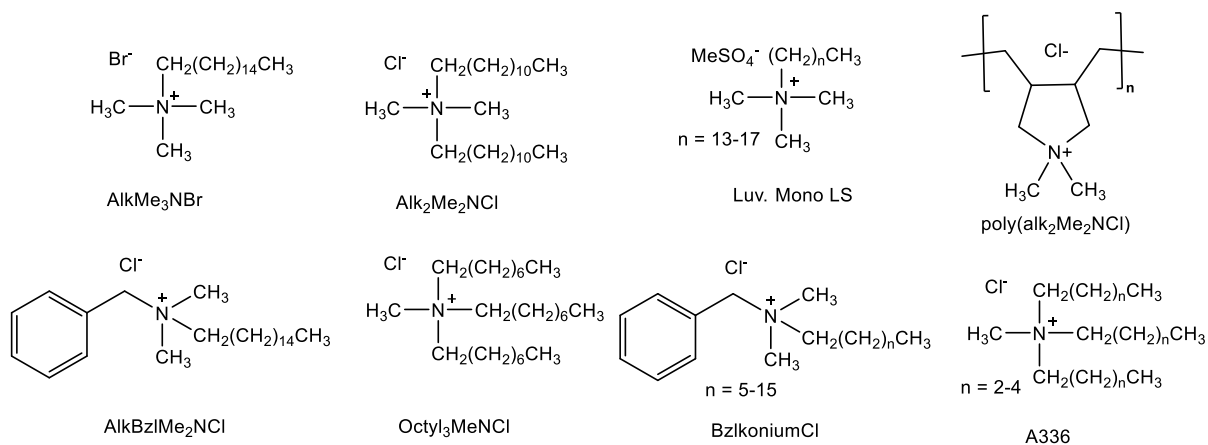

**Figure S1.** Structural drawings of tested R<sub>4</sub>NX.

(AlkMe<sub>3</sub>NBr – cetyltrimethylammonium bromide; Alk<sub>2</sub>Me<sub>2</sub>NCl – dilauryldimethylammonium chloride; AlkBzIme<sub>2</sub>NCl – benzyldimethylhexadecylammonium chloride; Octyl<sub>3</sub>MeNCl – trioctylmethylammonium chloride; Luv. Mono LS – Luviquat Mono LS; BzlkoniumCl – Benzalkonium chloride; poly(Alk<sub>2</sub>Me<sub>2</sub>NCl) – poly(dialkyldimethylammonium chloride); A336 – Aliquat 336)

**Figure S2.**  $^1\text{H}$  NMR spectra of evaporated residue of  $\text{CH}_2\text{Cl}_2$  extracts of MB9 ( $\text{DMSO-d}_6$ ).

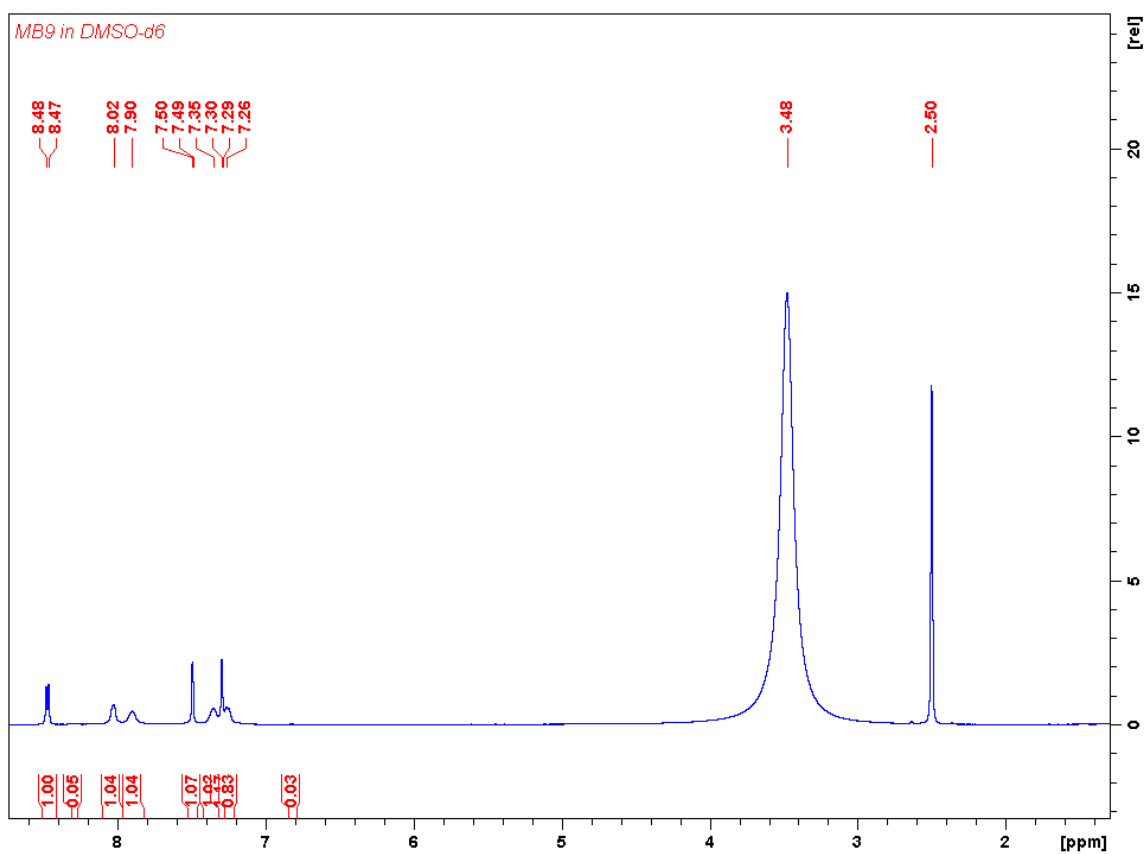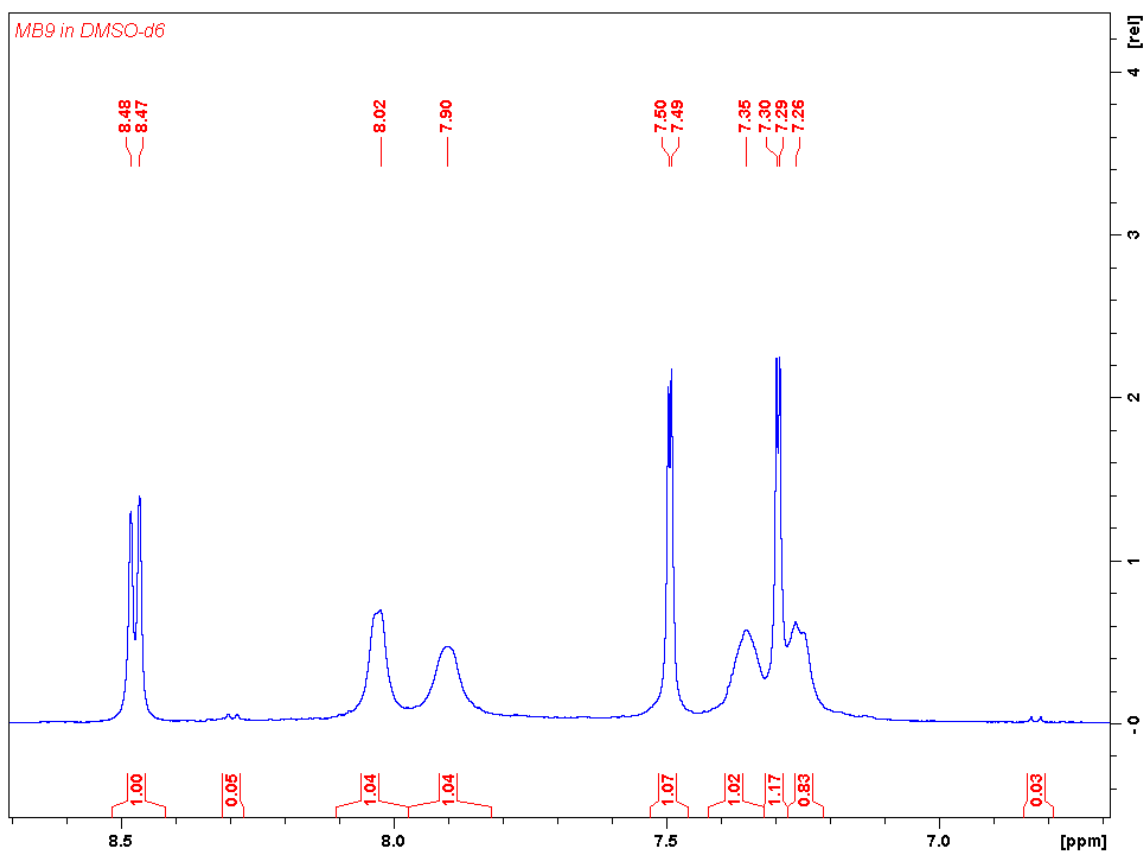

**Figure S3.**  $^1\text{H}$  NMR spectra of evaporated residue of  $\text{CH}_2\text{Cl}_2$  extracts obtained after the reaction of MB9 in aqueous solution with  $\text{AlkMe}_3\text{NBr}$  ( $\text{DMSO-d}_6$ ).

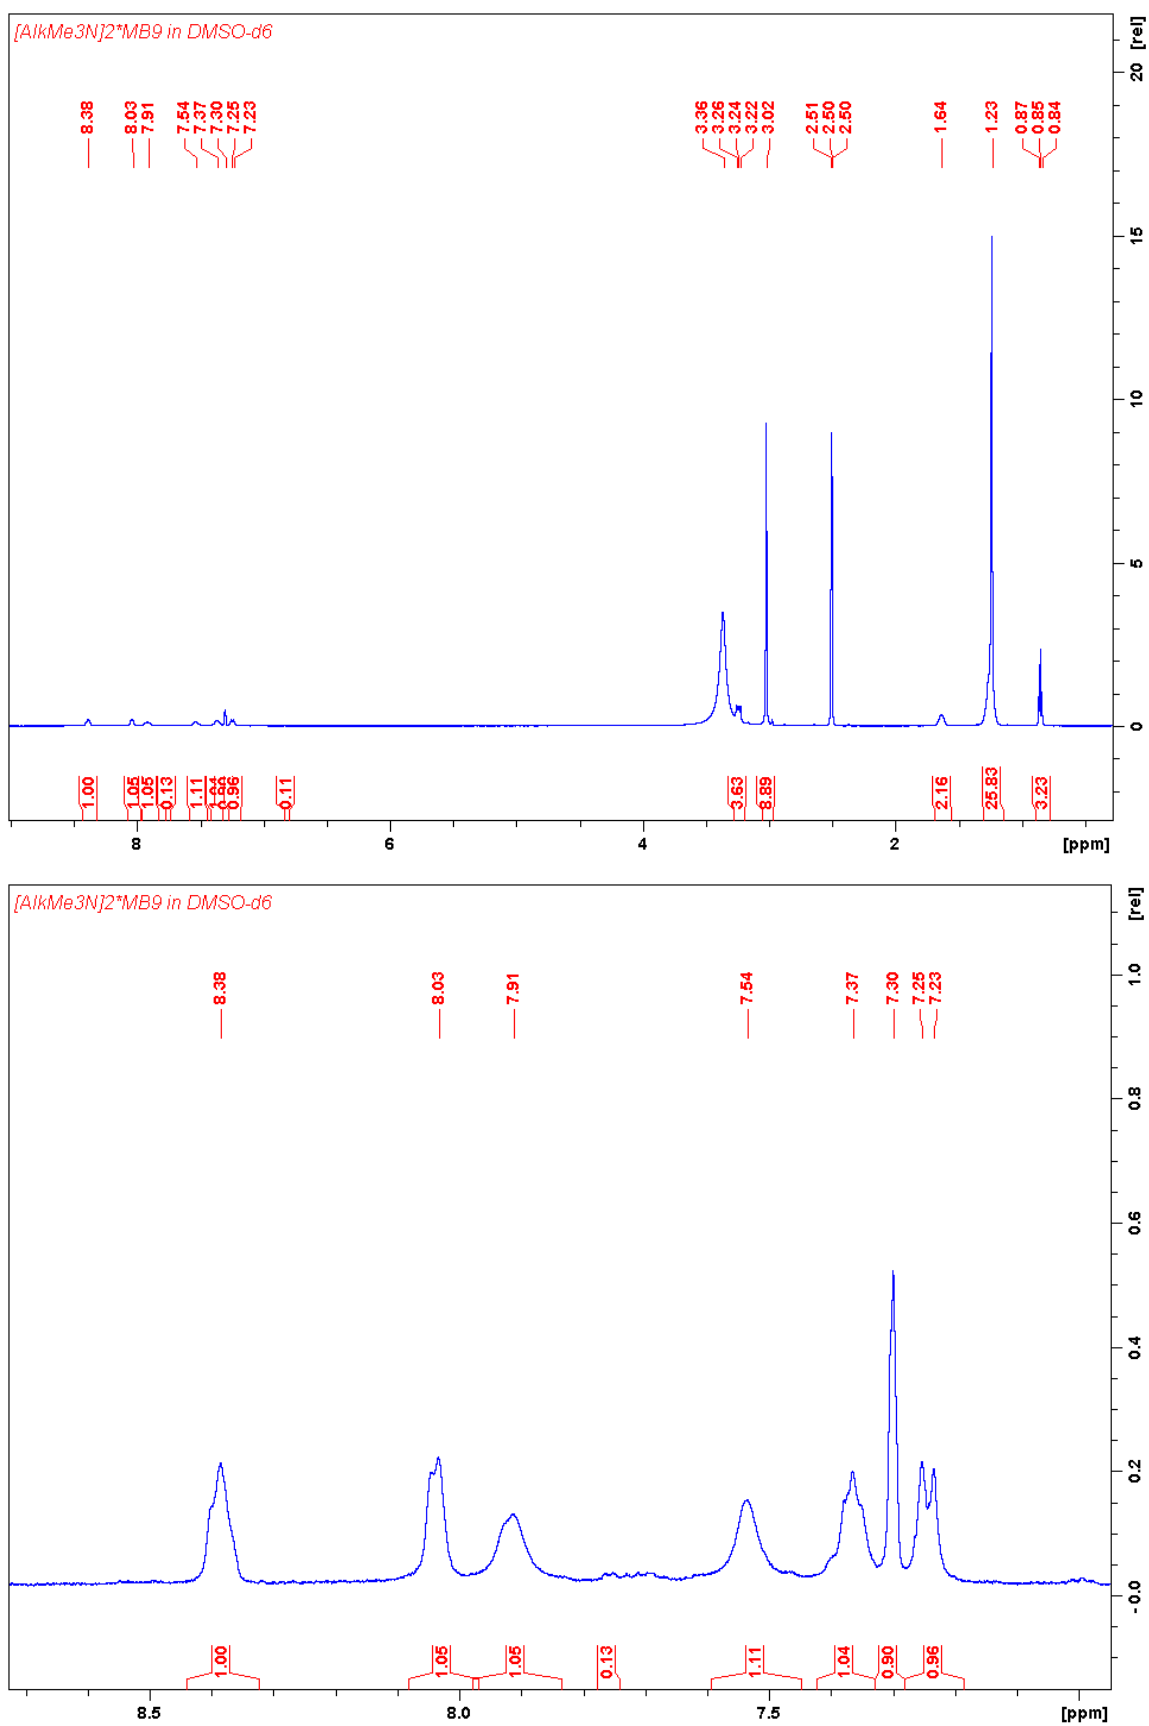

**Figure S4.**  $^1\text{H}$  NMR spectra of evaporated residue of  $\text{CH}_2\text{Cl}_2$  extracts obtained after the reaction of MB9 in aqueous solution with  $\text{AlkBzMe}_2\text{NCl}$  ( $\text{CDCl}_3$ ).

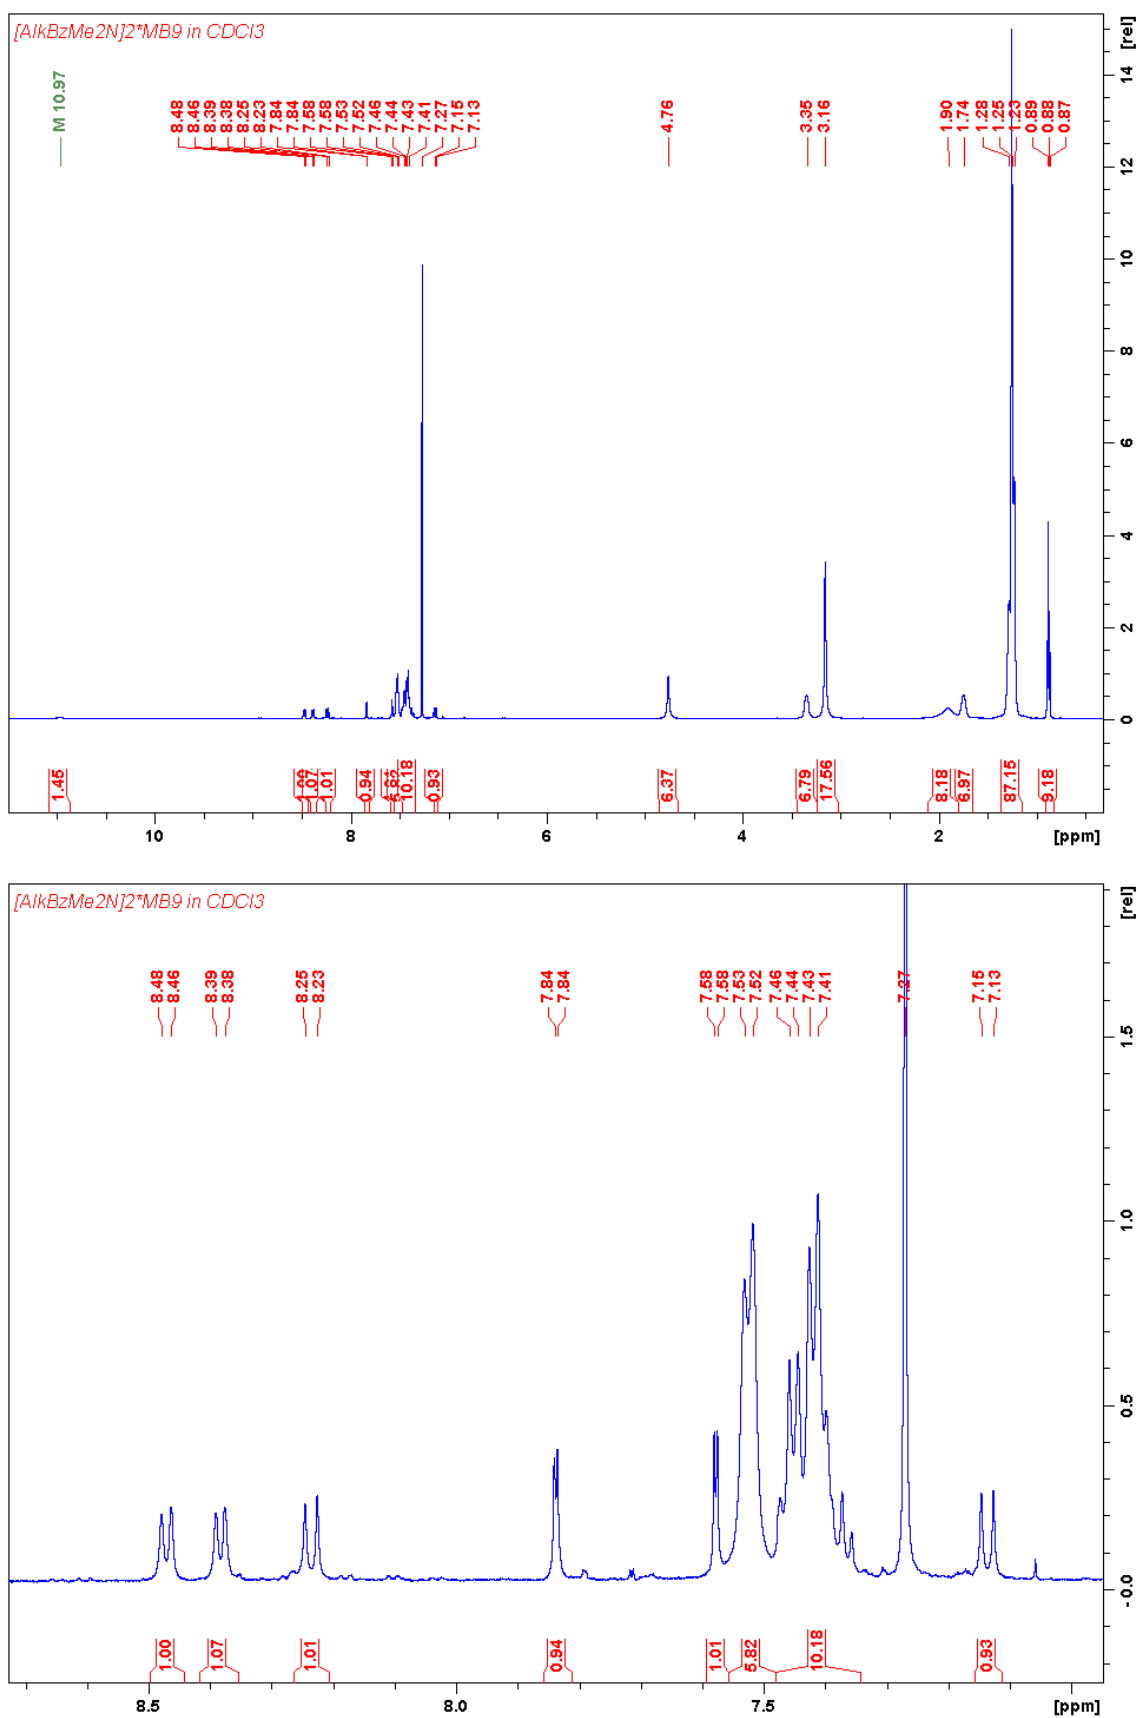



**Figure S5.**  $^1\text{H}$  NMR spectra of evaporated residue of  $\text{CH}_2\text{Cl}_2$  extracts obtained after the reaction of MB9 in aqueous solution with Octyl<sub>3</sub>MeNCl ( $\text{CDCl}_3$ ).

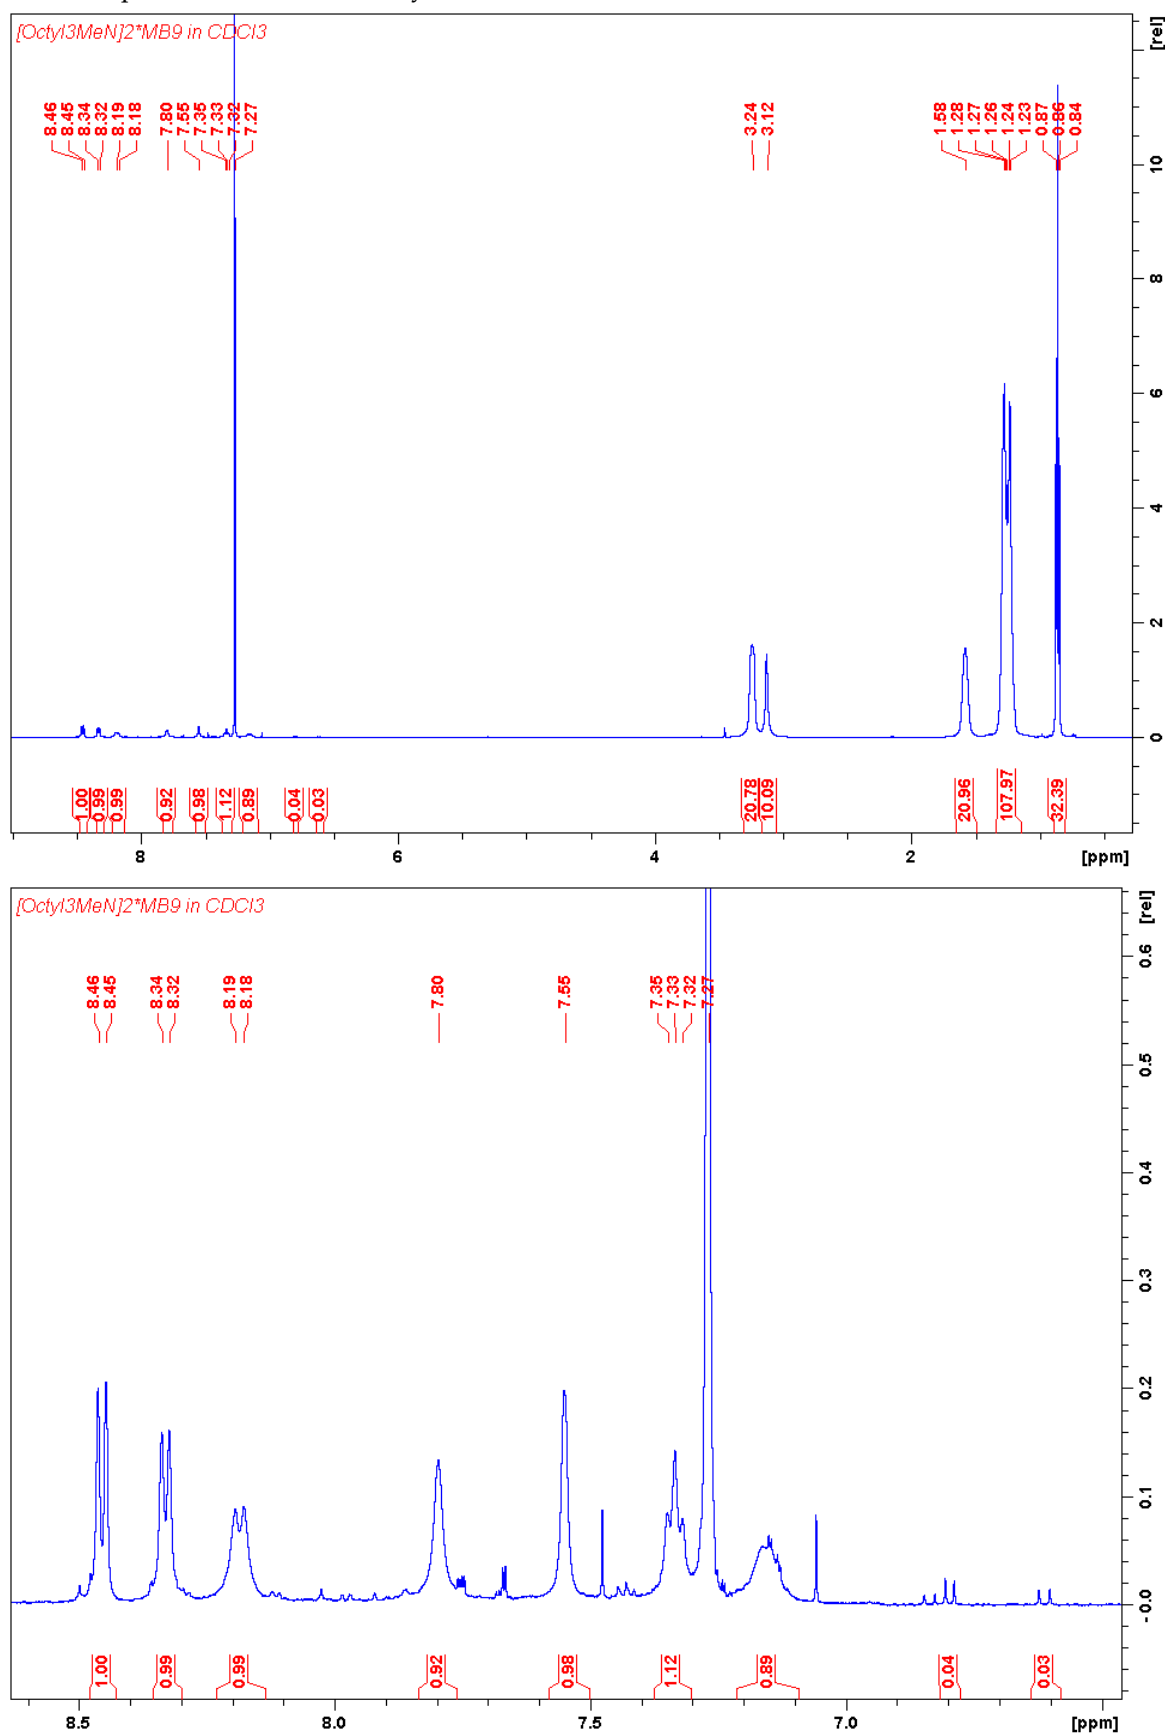

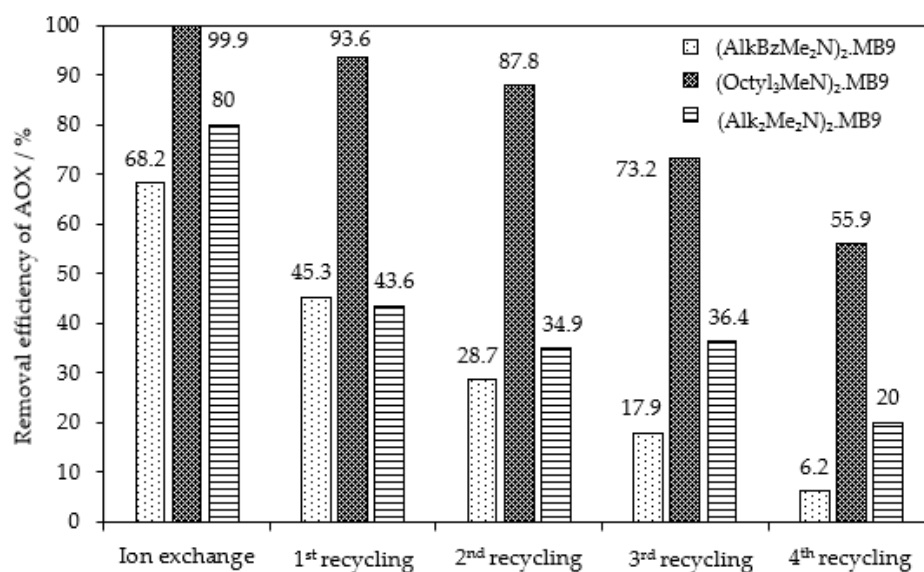

**Figure S6.** Results of the effectiveness of the AOX removal of (R<sub>4</sub>N)<sub>2</sub>.MB9 within four recycling steps. (Ion pair formation: 1.2 mmol of R<sub>4</sub>NX in 50 mL CH<sub>3</sub>OH + 0.5 mmol of MB9 in 120 mL H<sub>2</sub>O / Reduction: addition of 25 mmol NaBH<sub>4</sub> to ion pair solution in the 1<sup>st</sup>-2<sup>nd</sup> cycle and 50 mmol of NaBH<sub>4</sub> in the 3<sup>rd</sup>-4<sup>th</sup> cycle / Recycling: generated ion pair species in 50 mL CH<sub>3</sub>OH + 0.5 mmol of MB9 in 120 mL of H<sub>2</sub>O; reaction time of the ion exchange 1 hour and reaction time of the reduction 2 hours).

**Figure S7. a)** LC chromatogram of the LC-MS analysis of the reaction mixture obtained after the reductive degradation of ion pair (AlkMe<sub>3</sub>N)<sub>2</sub>.MB9 using NaBH<sub>4</sub>/Na<sub>2</sub>S<sub>2</sub>O<sub>5</sub> and NiSO<sub>4</sub>.

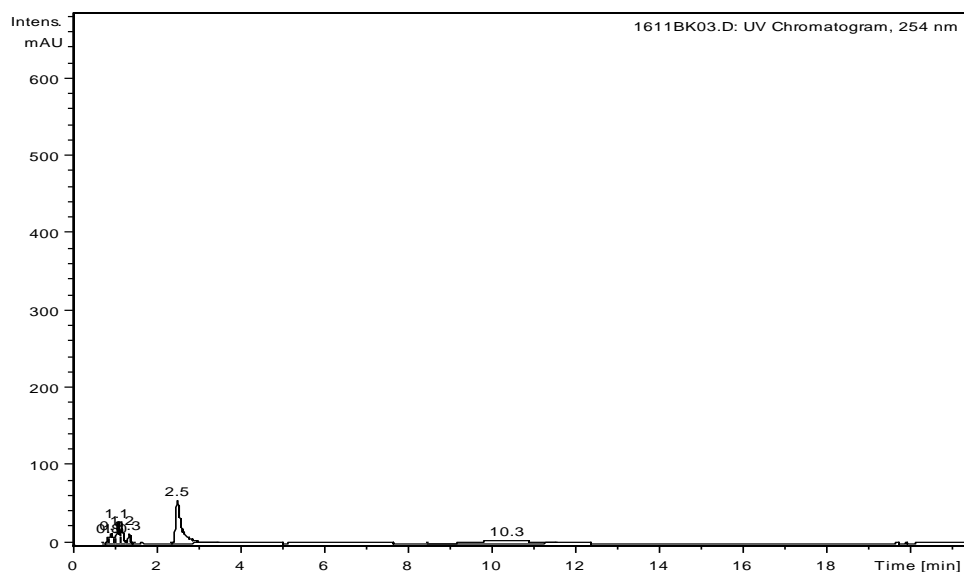

**b)** Qualitative LC-MS analysis of the reaction mixture obtained after the reductive degradation of ion pair (AlkMe<sub>3</sub>N)<sub>2</sub>.MB9 using NaBH<sub>4</sub>/Na<sub>2</sub>S<sub>2</sub>O<sub>5</sub> and Al-Ni/NaOH.

| <i>RT (min)</i> | <i>MW</i> | <i>Structure</i> |
|-----------------|-----------|------------------|
| 2.5             | 223       |                  |
| 10.3            | 430       |                  |

Note: Structures of the detected isomer compounds could not be confirmed due to the lack of corresponding standard compounds.

c) Mass spectra (EI, 70 eV) of analyzed components.

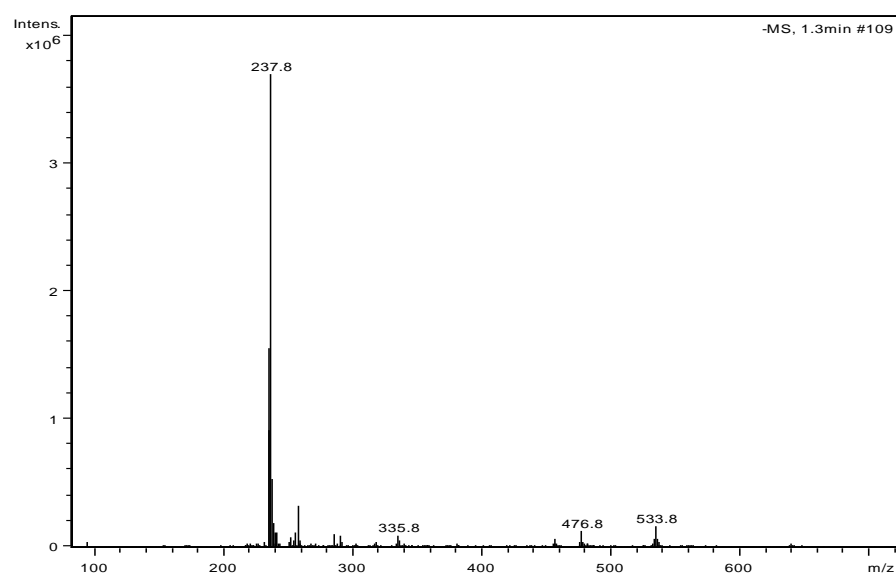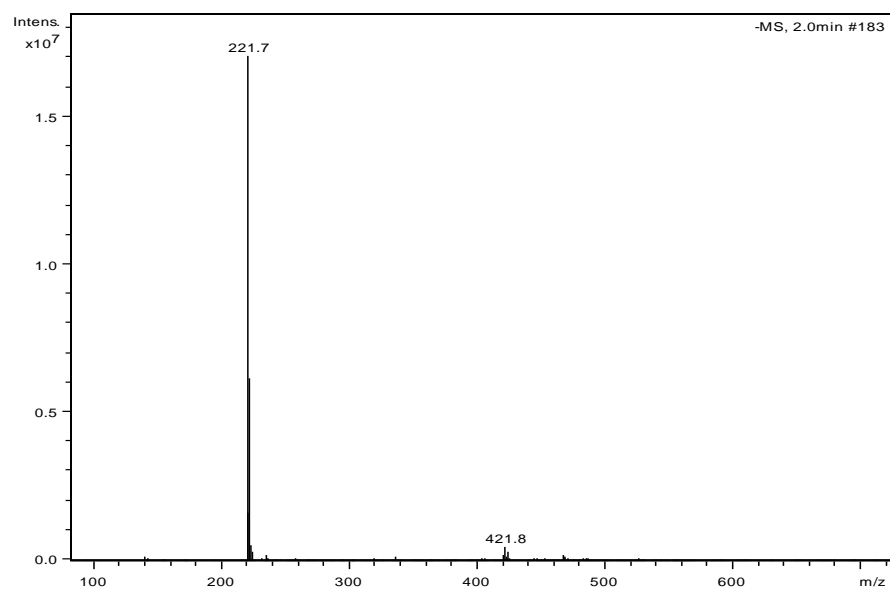

**Figure S8. a)** LC chromatogram of the LC-MS analysis of the reaction mixture obtained after the reductive degradation of ion pair (AlkMe<sub>3</sub>N)<sub>2</sub>.MB9 using NaBH<sub>4</sub>/Na<sub>2</sub>S<sub>2</sub>O<sub>5</sub>/NiSO<sub>4</sub> and Al-Ni/NaOH.

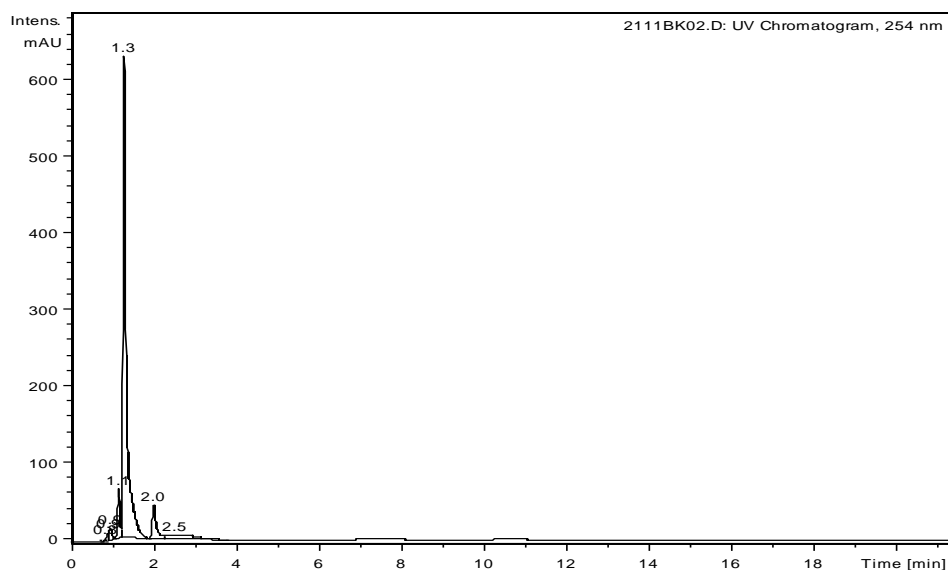

**b)** Qualitative LC-MS analysis of the reaction mixture obtained after the reductive degradation of ion pair (AlkMe<sub>3</sub>N)<sub>2</sub>.MB9 using NaBH<sub>4</sub>/Na<sub>2</sub>S<sub>2</sub>O<sub>5</sub> and Al-Ni/NaOH.

| <i>RT (min)</i> | <i>MW</i> | <i>Structure</i> |
|-----------------|-----------|------------------|
| 1.3             | 239       |                  |
| 2.0             | 223       |                  |
| 2.5             | 223       |                  |

Note: Structures of the detected isomer compounds could not be confirmed due to the lack of corresponding standard compounds.

c) Mass spectra (EI, 70 eV) of analyzed components.

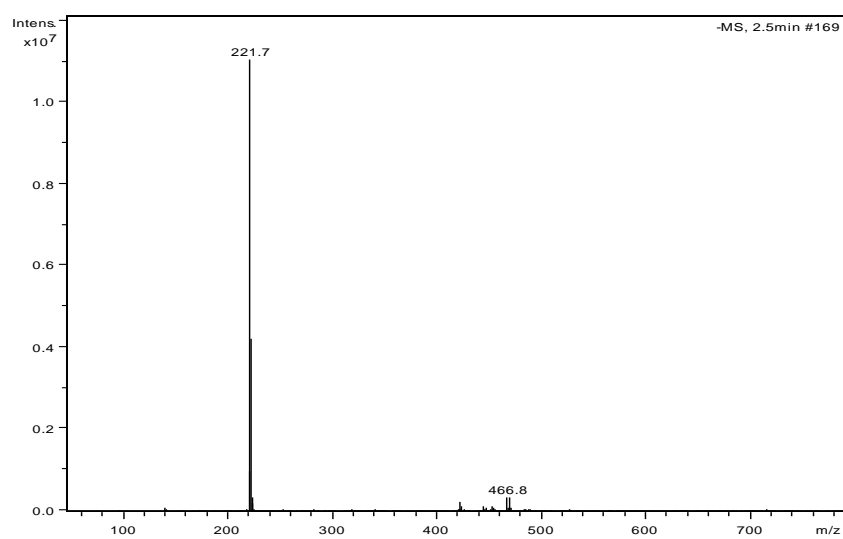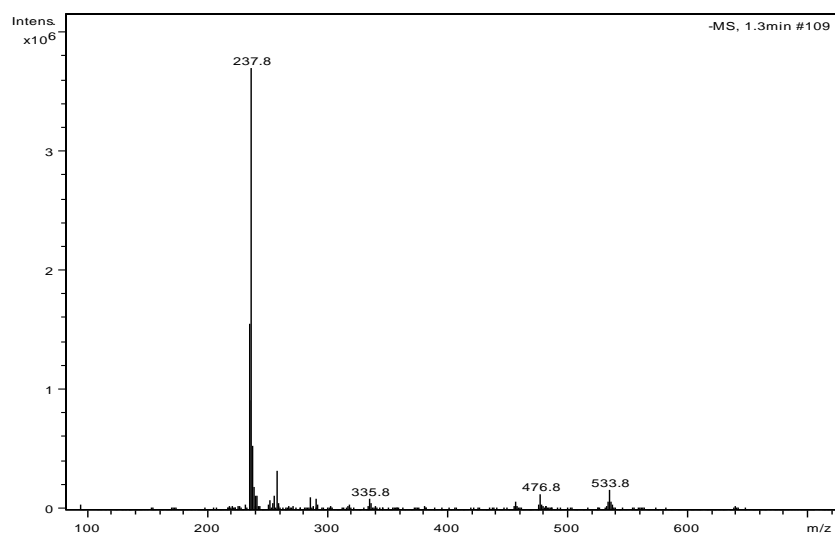

**Figure S9. a)** LC chromatogram of the LC-MS analysis of the reaction mixture obtained after the reductive degradation of ion pair (Luv. Mono LS)<sub>2</sub>.MB9 using NaBH<sub>4</sub>/NiSO<sub>4</sub>.

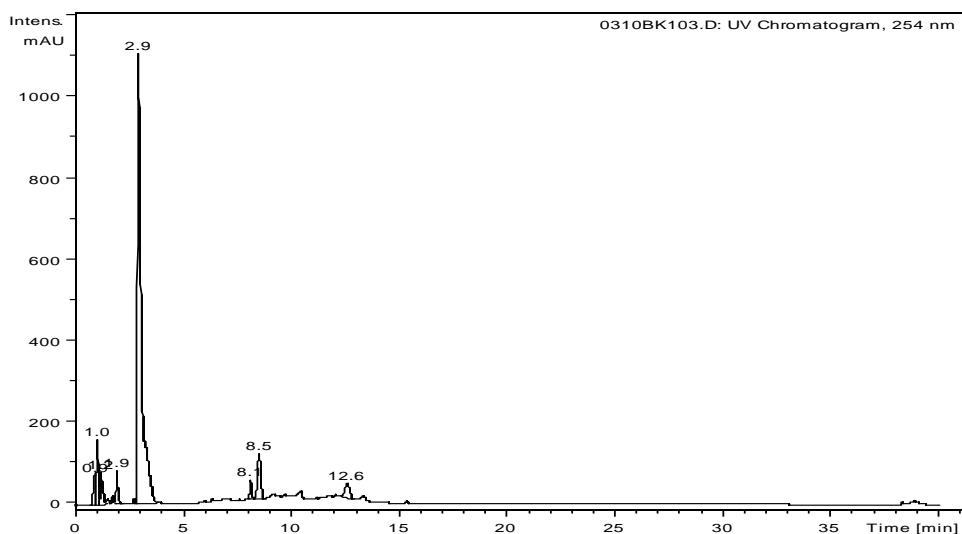

**b)** Qualitative LC-MS analysis of the reaction mixture obtained after the reductive degradation of ion pair (Luv. Mono LS)<sub>2</sub>.MB9 using NaBH<sub>4</sub>/NiSO<sub>4</sub>.

| <i>RT (min)</i> | <i>MW</i> | <i>Structure</i>               |
|-----------------|-----------|--------------------------------|
| 0.9             | -         | detected chlorinated structure |
| 1.0             | -         | detected chlorinated structure |
| 1.2             | -         | detected chlorinated structure |
| 1.9             | -         | detected chlorinated structure |
| 2.9             | 223       |                                |
| 8.1             | -         | detected chlorinated structure |
| 8.5             | -         | detected chlorinated structure |
| 12.6            | 424       |                                |

Note: Structures of the detected isomer compounds could not be confirmed due to the lack of corresponding standard compounds.

c) Mass spectra (EI, 70 eV) of analyzed components.

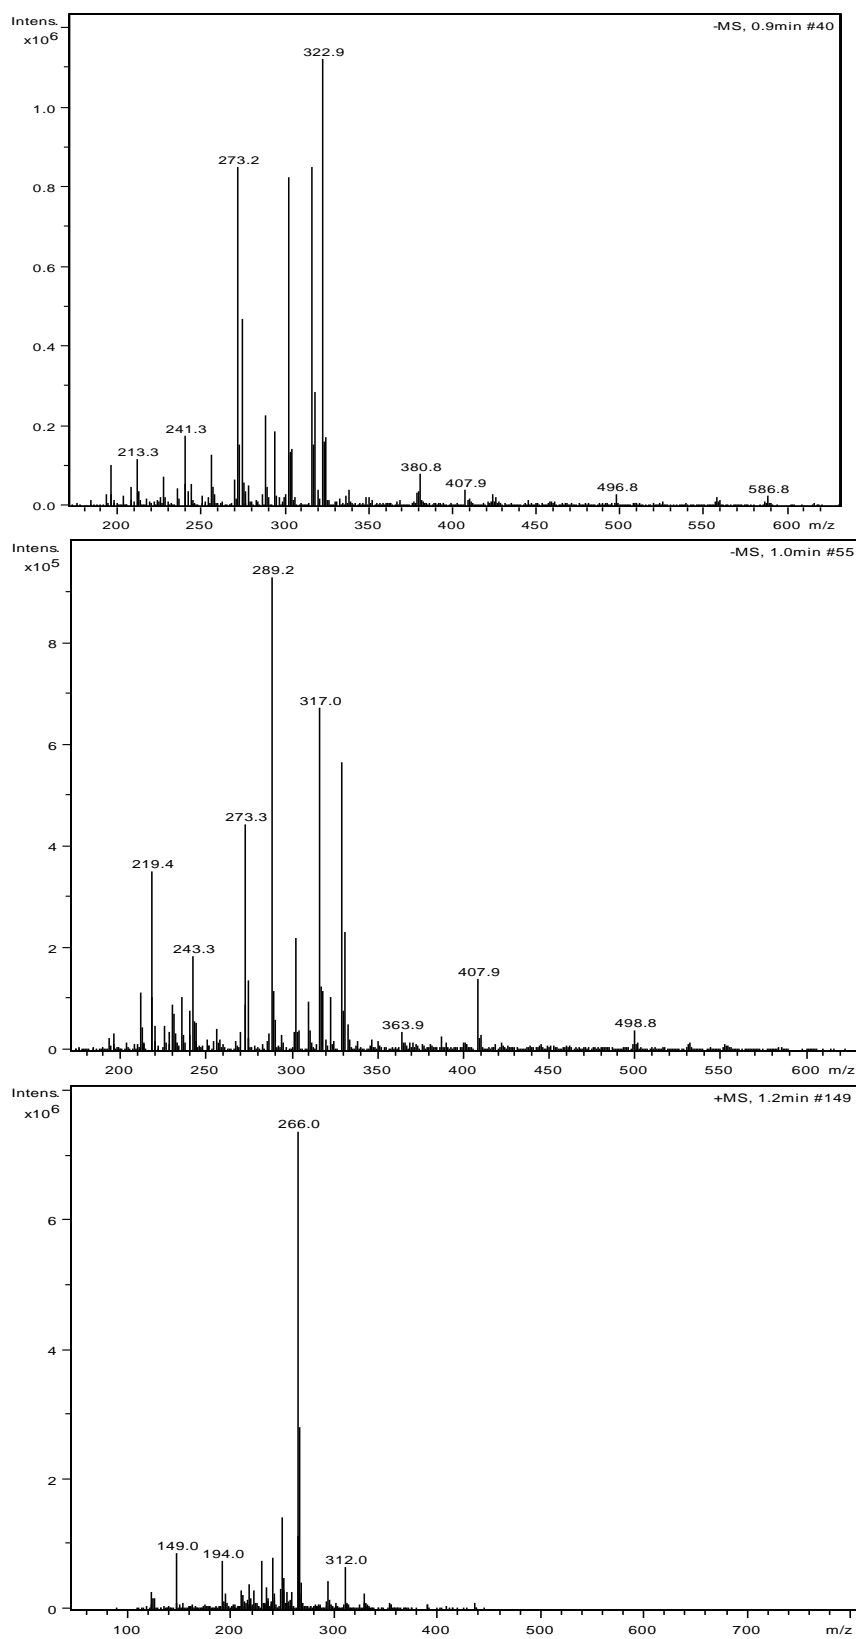



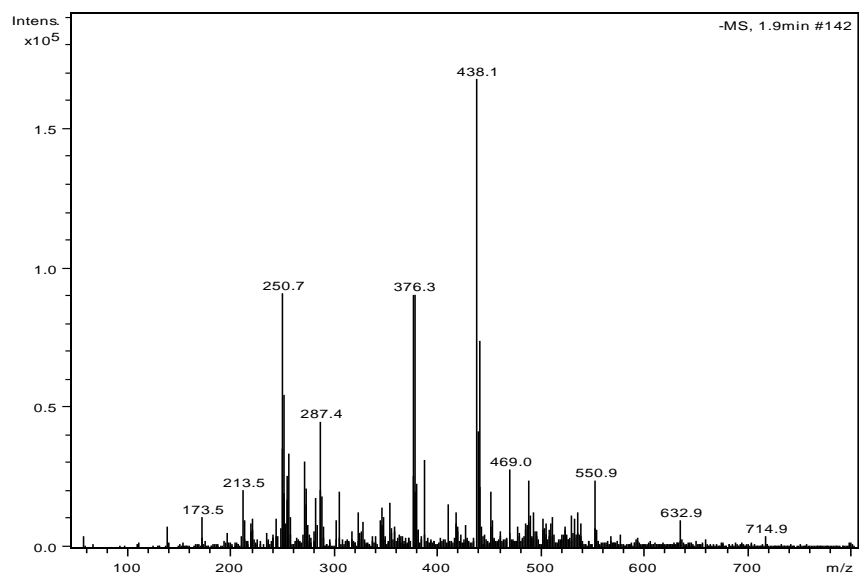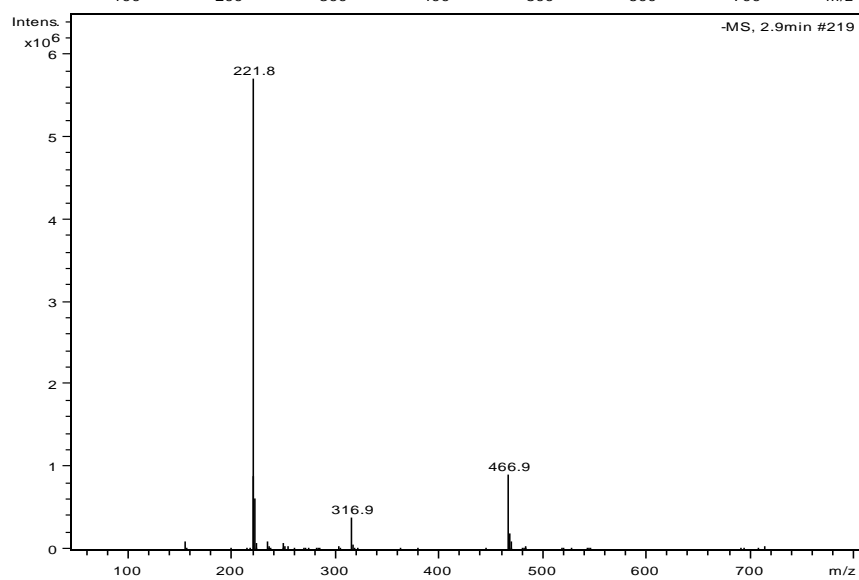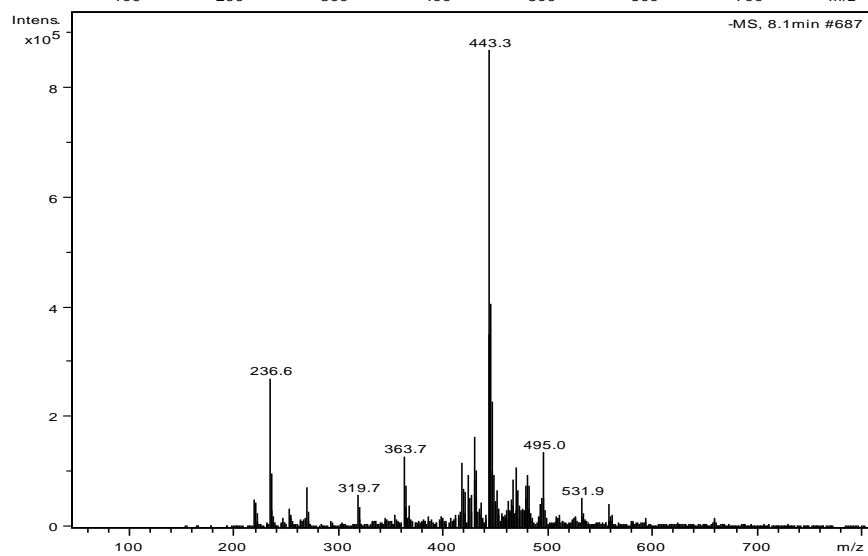

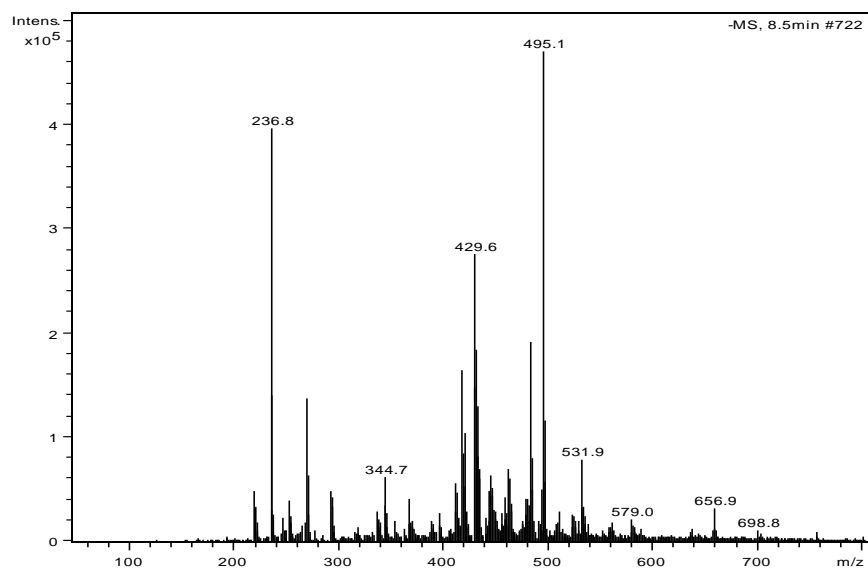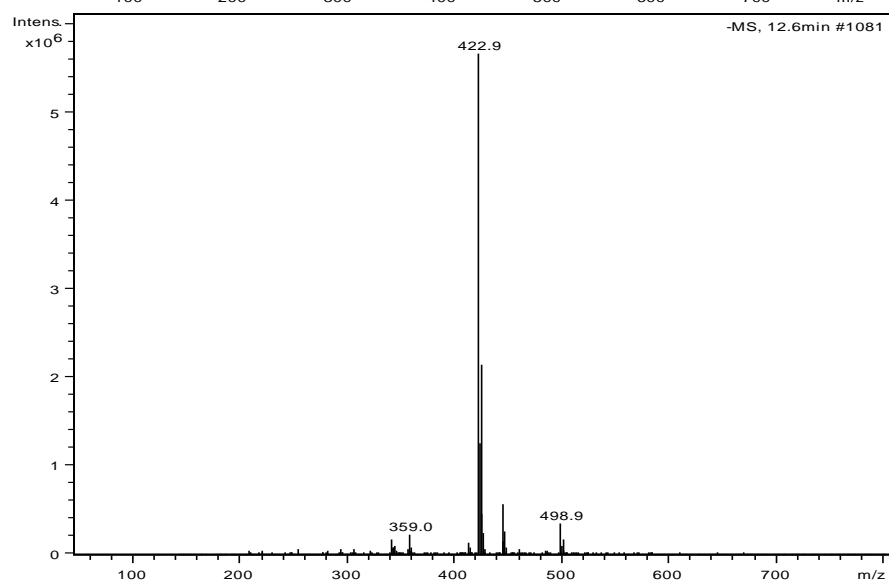

**Figure S10. a)** LC chromatogram of the LC-MS analysis of the reaction mixture obtained after the reductive degradation of ion pair (Octyl<sub>3</sub>MeN)<sub>2</sub>.MB9 using NaBH<sub>4</sub>/NiSO<sub>4</sub> in combination with Al-Ni alloy.

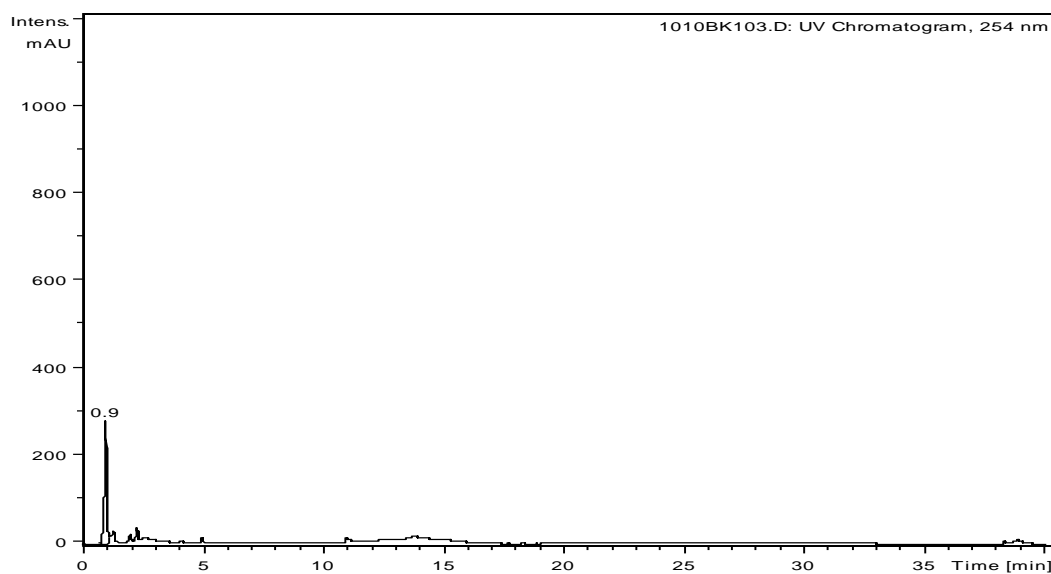

**b)** Qualitative LC-MS analysis of the reaction mixture obtained after the reductive degradation of ion pair (Octyl<sub>3</sub>MeN)<sub>2</sub>.MB9 using NaBH<sub>4</sub>/NiSO<sub>4</sub> in combination with Al-Ni alloy.

| <i>RT (min)</i> | <i>MW</i> | <i>Structure</i>                   |
|-----------------|-----------|------------------------------------|
| 0.9             | -         | detected non-chlorinated structure |

Note: Structures of the detected isomer compounds could not be confirmed due to the lack of corresponding standard compounds.

**c)** Mass spectrum (EI, 70 eV) of analyzed component.

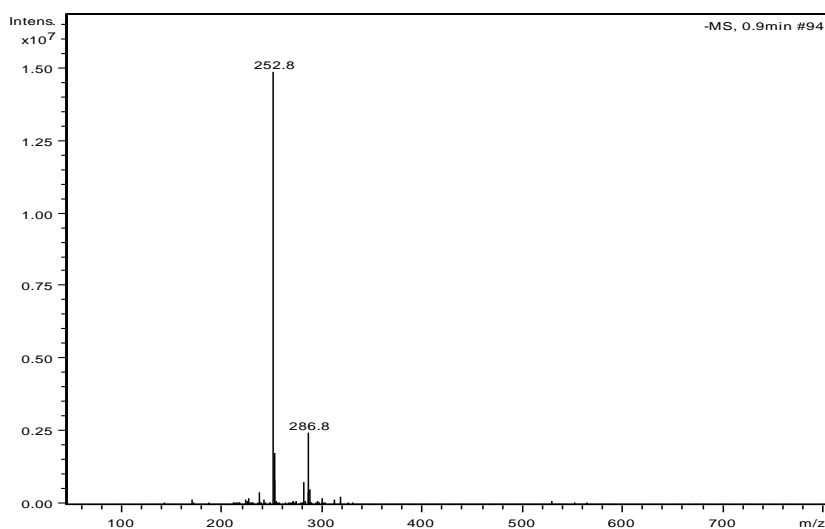

**Figure S11. a)** LC chromatogram of the LC-MS analysis of the reaction mixture obtained after the reductive degradation of ion pair (Luv. Mono LS)<sub>2</sub>.AY17 using NaBH<sub>4</sub>/NiSO<sub>4</sub> in combination with Al-Ni alloy.

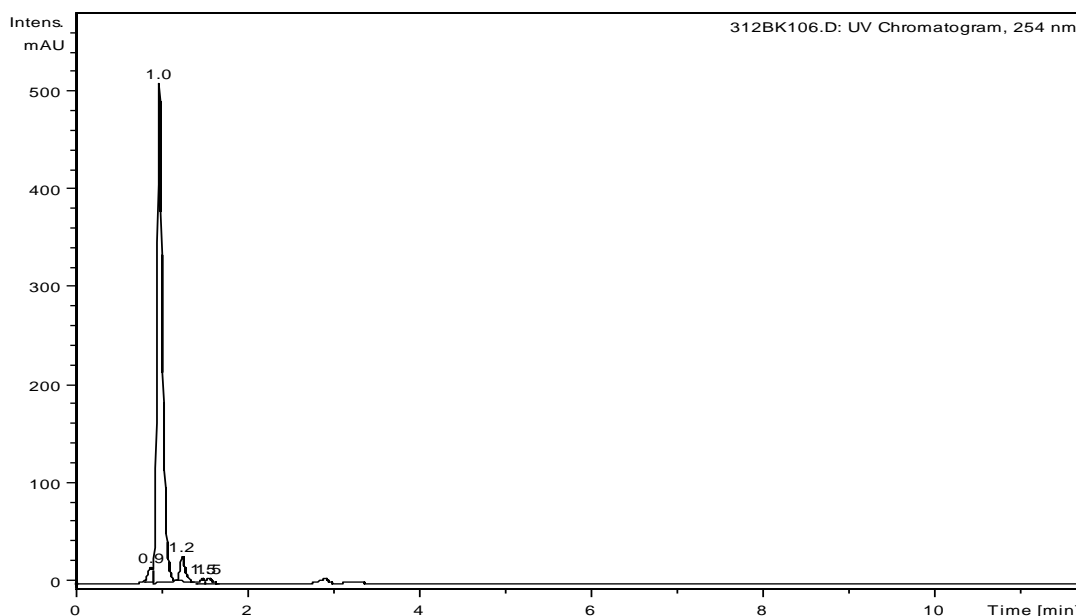

**b)** Qualitative LC-MS analysis of the reaction mixture obtained after the reductive degradation of ion pair (Luv. Mono LS)<sub>2</sub>.AY17 using NaBH<sub>4</sub>/NiSO<sub>4</sub> in combination with Al-Ni alloy.

| <i>RT (min)</i> | <i>MW</i> | <i>Structure</i>                                                                     |
|-----------------|-----------|--------------------------------------------------------------------------------------|
| 1.0             | 173       | 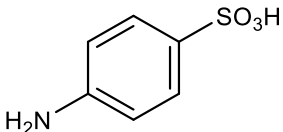 |

Note: Structures of the detected isomer compounds could not be confirmed due to the lack of corresponding standard compounds.

**c)** Mass spectrum (EI, 70 eV) of analyzed component.

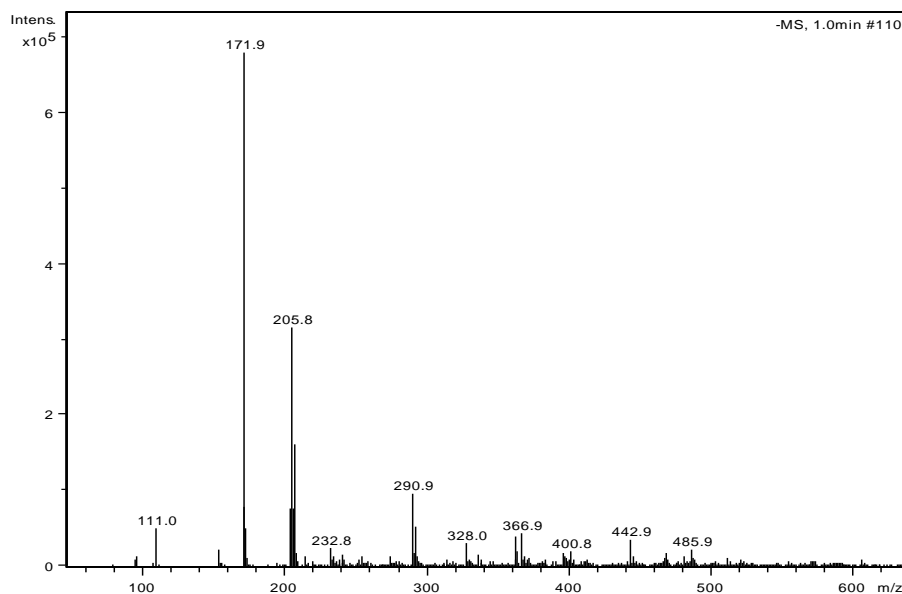

**Figure S12. a)** LC chromatogram of the LC-MS analysis of the reaction mixture obtained after the reductive degradation of ion pair (Octyl<sub>3</sub>MeN)<sub>2</sub>.AY17 using NaBH<sub>4</sub>/NiSO<sub>4</sub>.

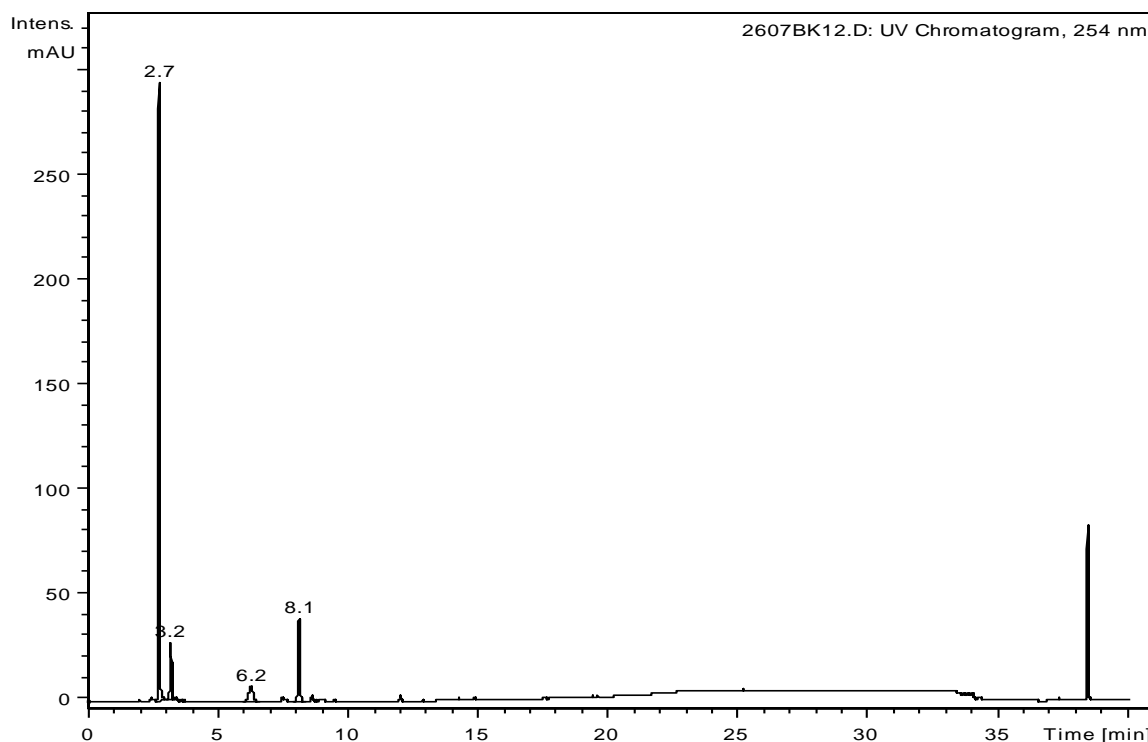

**b)** Qualitative LC-MS analysis of the reaction mixture obtained after the reductive degradation of ion pair (Octyl<sub>3</sub>MeN)<sub>2</sub>.AY17 using NaBH<sub>4</sub>/NiSO<sub>4</sub>.

| <i>RT (min)</i> | <i>MW</i> | <i>Structure</i>                           |
|-----------------|-----------|--------------------------------------------|
| 2.7             | 173       | <chem>Nc1ccc(S(=O)(=O)O)cc1</chem>         |
| 3.2             | 207       | <chem>Nc1cc(Cl)cc(S(=O)(=O)O)c1</chem>     |
| 6.2             | 207       | <chem>Nc1cc(Cl)cc(S(=O)(=O)O)c1</chem>     |
| 8.1             | 241       | <chem>Nc1cc(Cl)c(S(=O)(=O)O)c(Cl)c1</chem> |

Note: Structures of the detected isomer compounds could not be confirmed due to the lack of corresponding standard compounds.

c) Mass spectra (EI, 70 eV) of analyzed components.

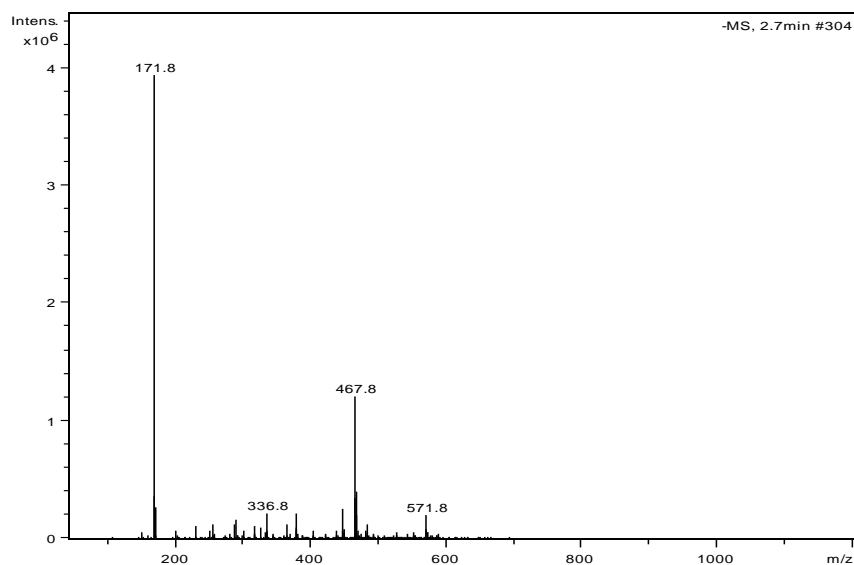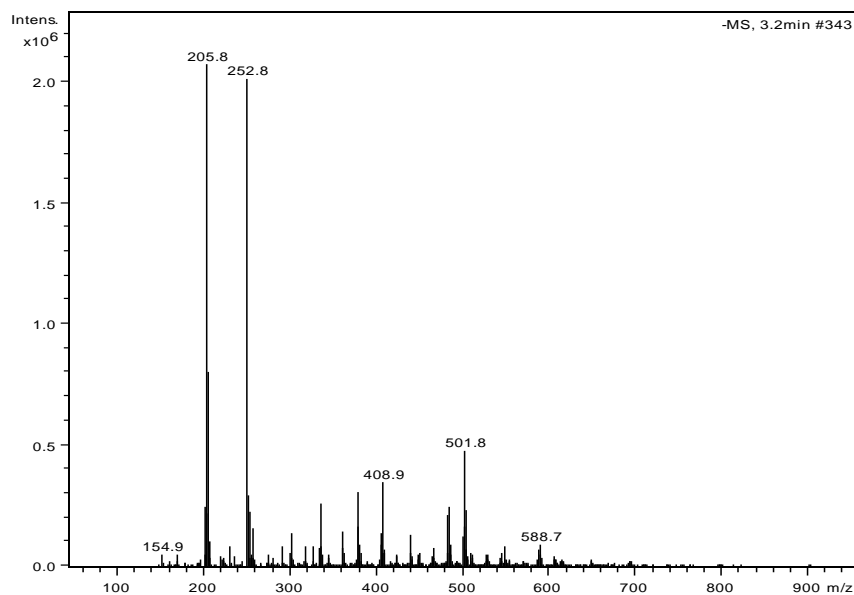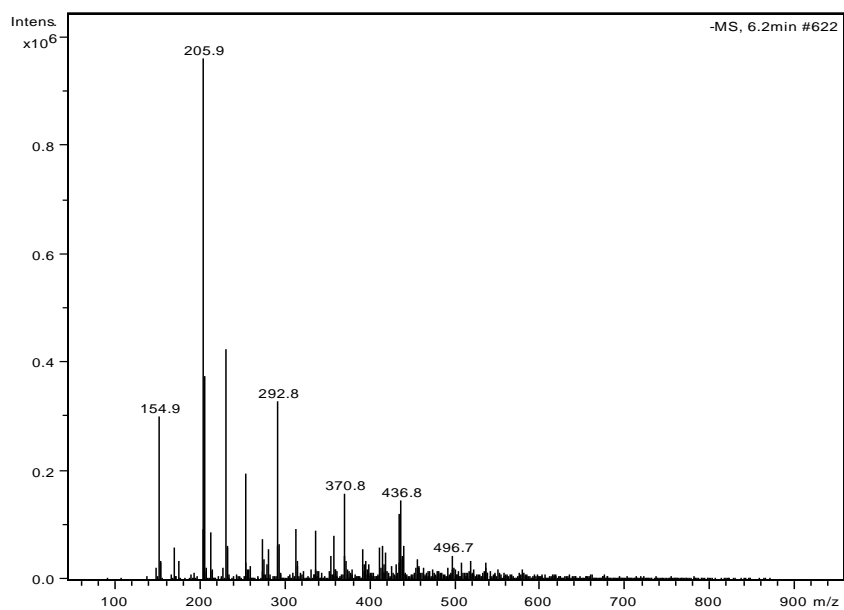

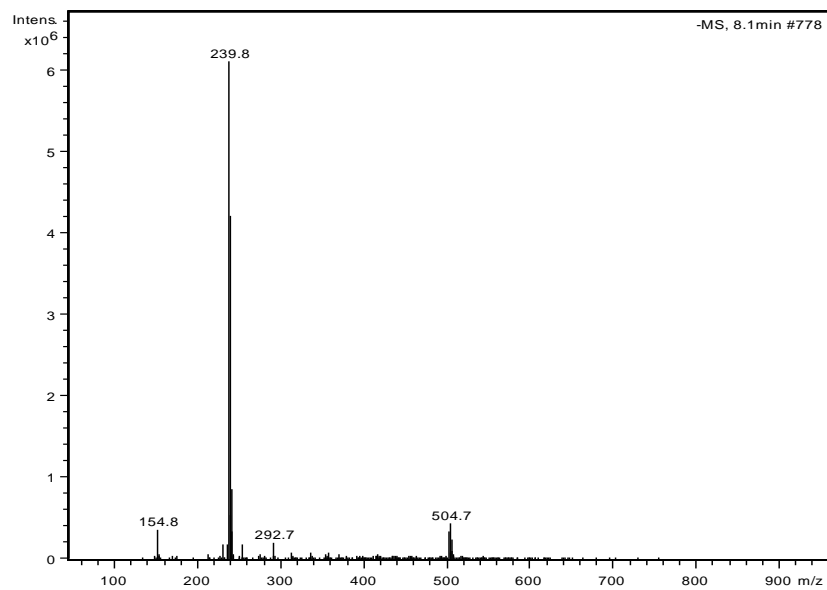

**Figure S13. a)** LC chromatogram of the LC-MS analysis of the reaction mixture obtained after the reductive degradation of ion pair (Luv.Mono LS)<sub>2</sub>.AY17 using NaBH<sub>4</sub>/NiSO<sub>4</sub>.

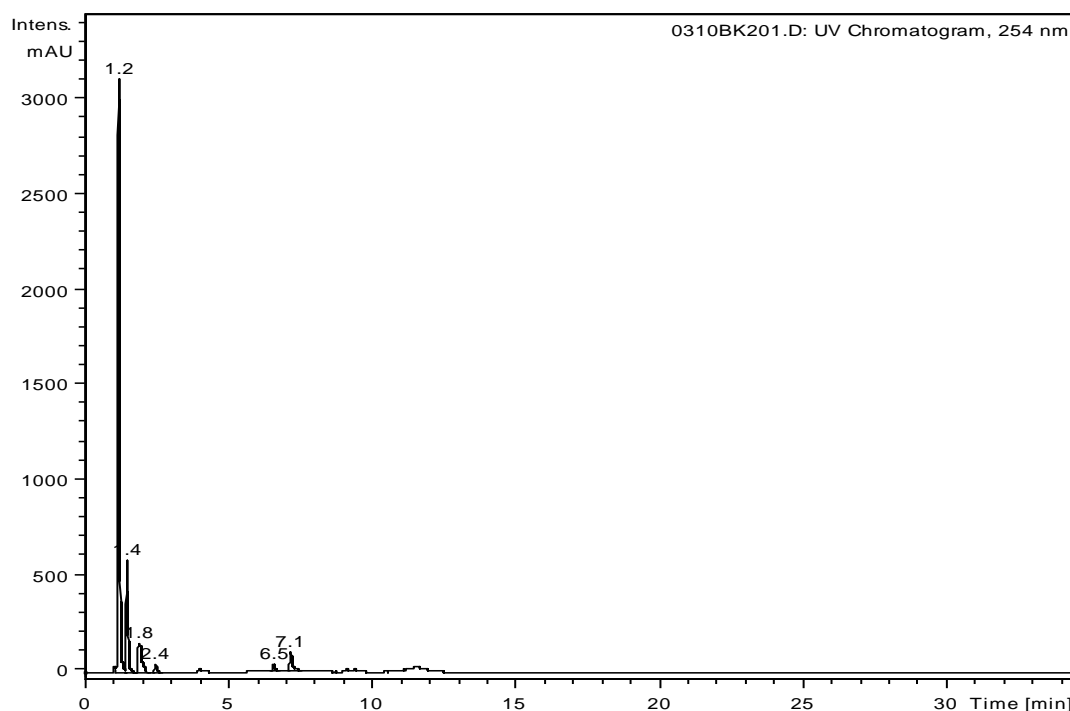

**b)** Qualitative LC-MS analysis of the reaction mixture obtained after the reductive degradation of ion pair (Luv.Mono LS)<sub>2</sub>.AY17 using NaBH<sub>4</sub>/NiSO<sub>4</sub>.

| <i>RT (min)</i> | <i>MW</i> | <i>Structure</i>                   |
|-----------------|-----------|------------------------------------|
| 1.2             | 173       |                                    |
| 1.4             | -         | detected non-chlorinated structure |
| 1.8             | -         | detected chlorinated structure     |
| 2.4             | 326       |                                    |
| 6.5             | 286       |                                    |



7.1

321

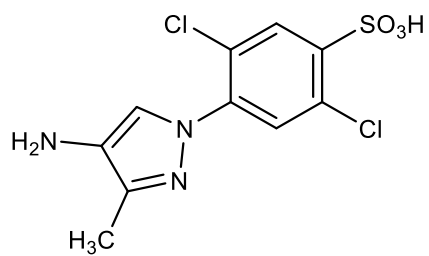

Note: Structures of the detected isomer compounds could not be confirmed due to the lack of corresponding standard compounds.

c) Mass spectra (EI, 70 eV) of analyzed components.

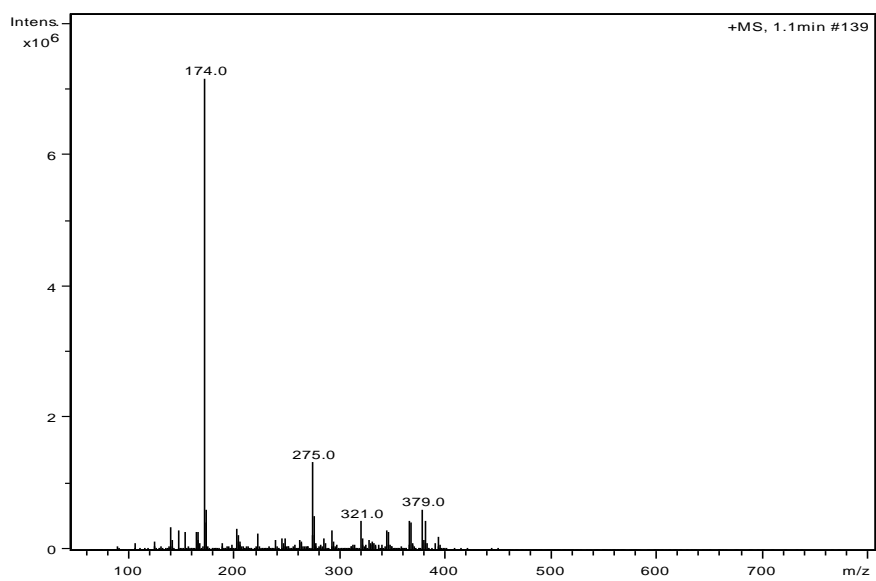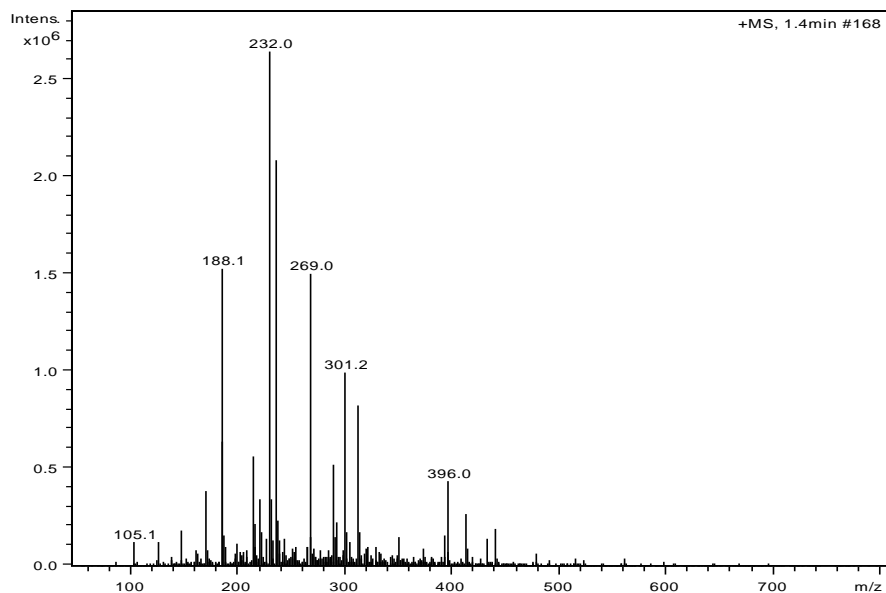

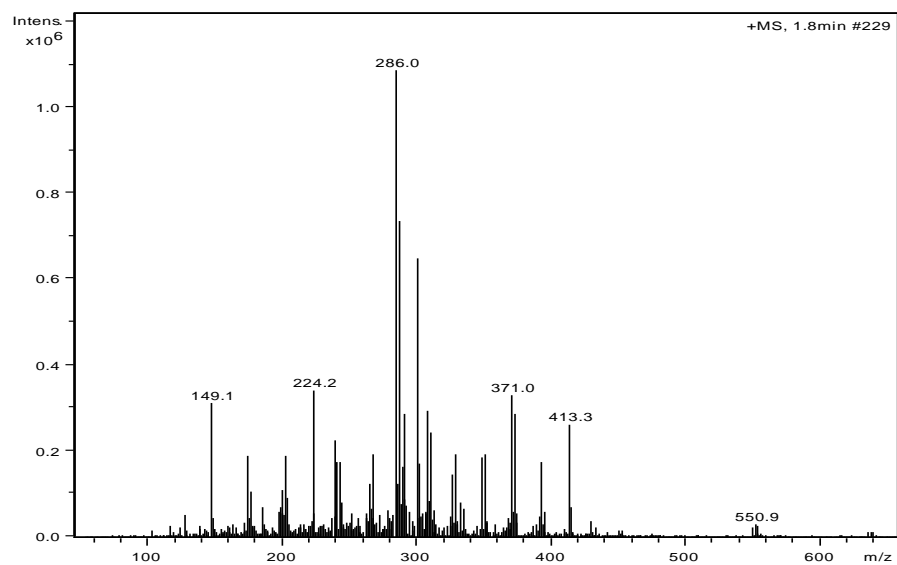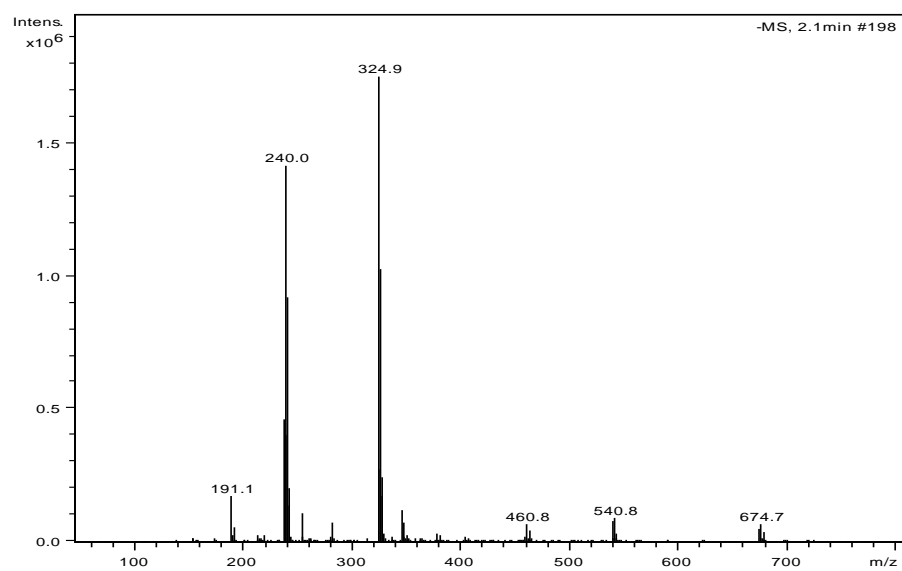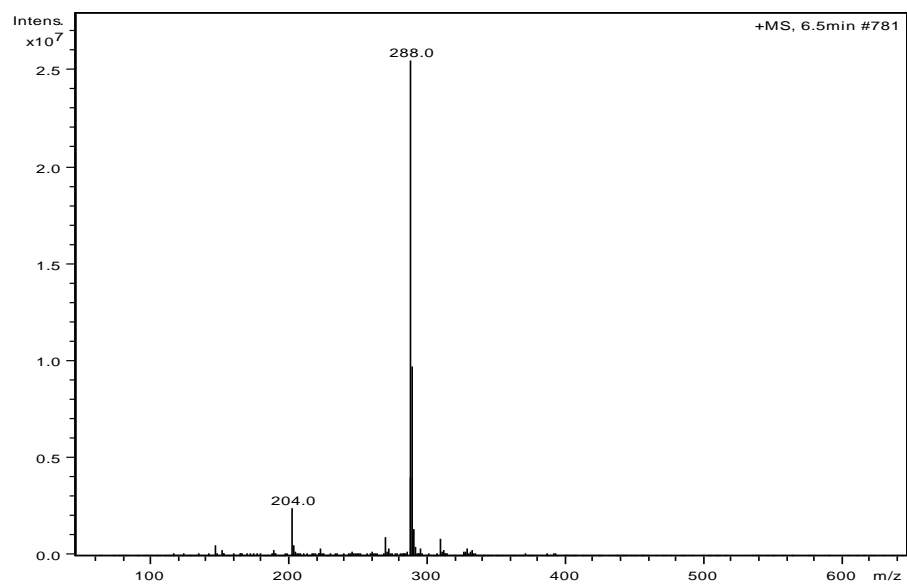

**Figure S14. a)** LC chromatogram of the LC-MS analysis of the reaction mixture obtained after the reductive degradation of ion pair (Octyl<sub>3</sub>MeN)<sub>2</sub>.MB9 using NaBH<sub>4</sub>/NiSO<sub>4</sub>.

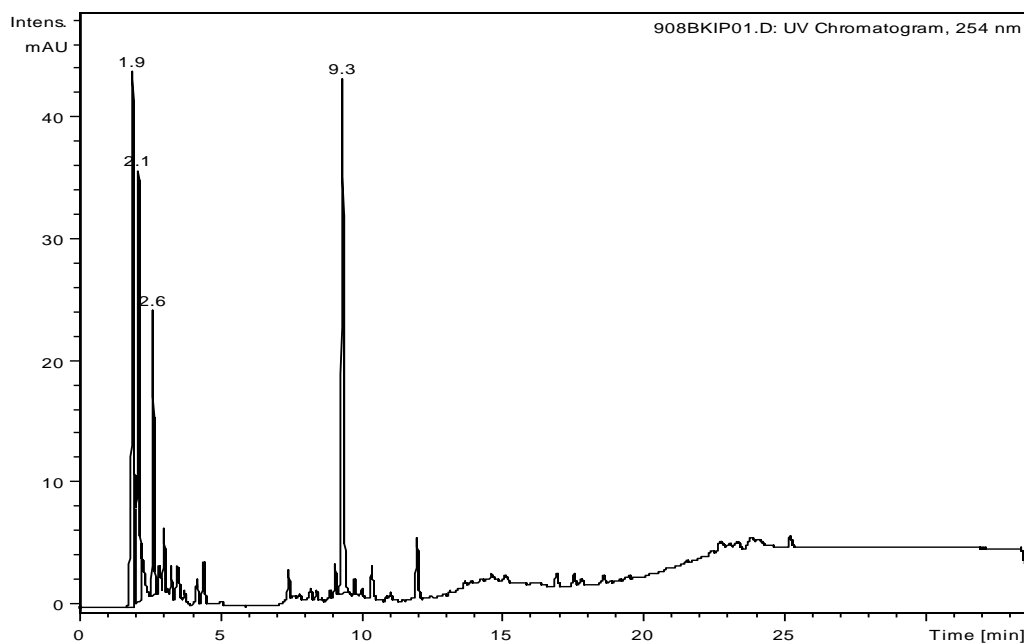

**b)** Qualitative LC-MS analysis of the reaction mixture obtained after the reductive degradation of ion pair (Octyl<sub>3</sub>MeN)<sub>2</sub>.MB9 using NaBH<sub>4</sub>/NiSO<sub>4</sub>.

| <i>RT (min)</i> | <i>MW *</i> | <i>Structure *</i> |
|-----------------|-------------|--------------------|
| 1.9             | n.d.        | n.d.               |
| 2.1             | n.d.        | n.d.               |
| 2.6             | n.d.        | n.d.               |
| 9.3             | 223         |                    |

\* *n.d.* – not determined

Note: Structures of the detected isomer compounds could not be confirmed due to the lack of corresponding standard compounds.

c) Mass spectra (EI, 70 eV) of analyzed components.

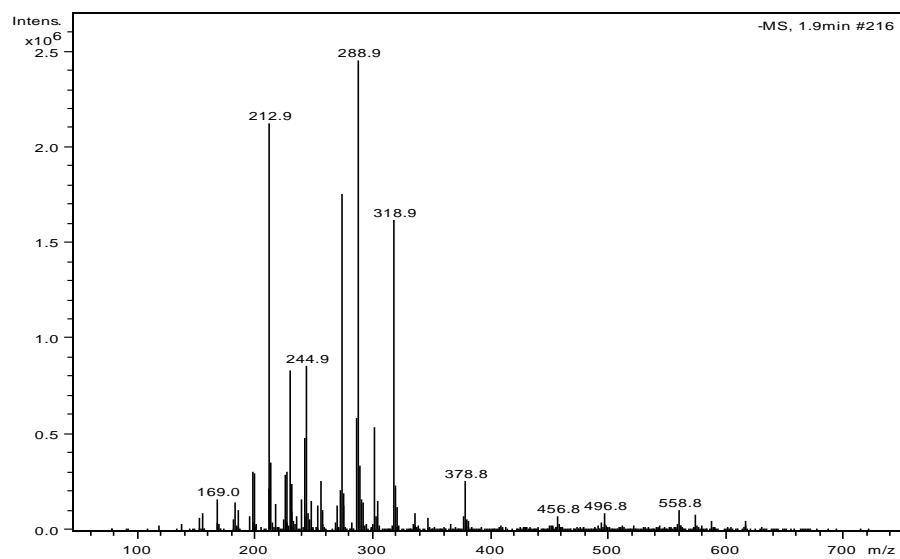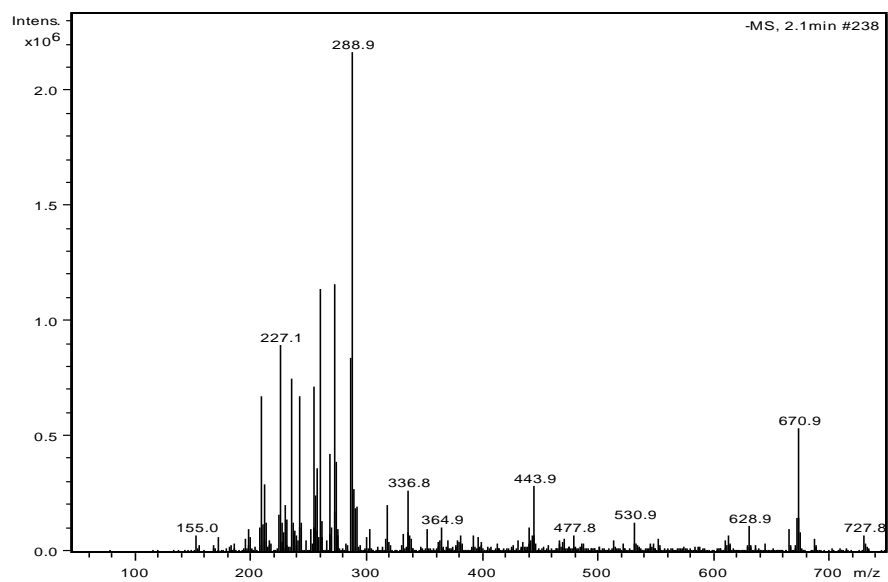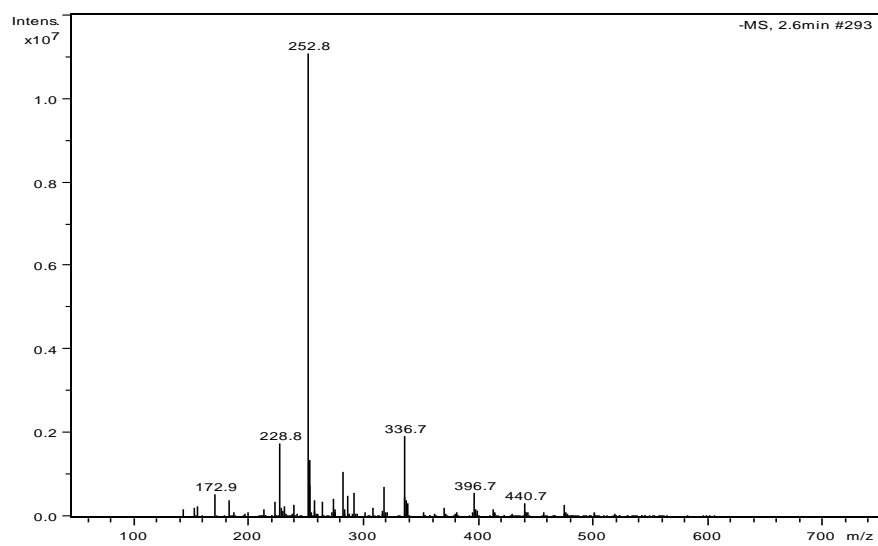

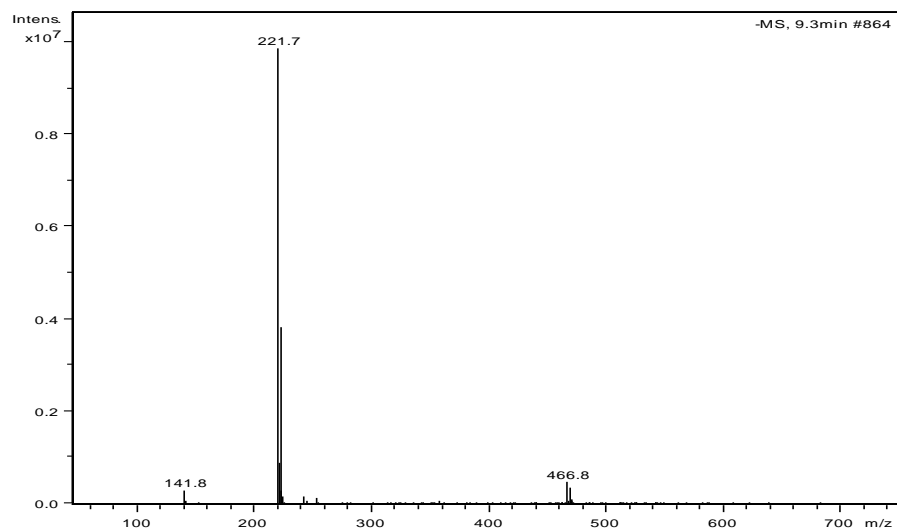

Supplement: s1 [file s1]
